## 24 **Summary**

25 The soilborne pathogen *Ralstonia solanacearum* is the causal agent of bacterial wilt, and causes  
26 significant crop loss in the Solanaceae family. The pathogen first infects roots, which are a  
27 critical source of resistance in tomato (*Solanum lycopersicum* L.). Roots of both resistant and  
28 susceptible plants are colonized by the pathogen, yet rootstocks can provide significant levels of  
29 resistance. Currently, mechanisms of this ‘root-mediated resistance’ remain largely unknown. To  
30 identify the molecular basis of this resistance, we analyzed the genome-wide transcriptional  
31 response of roots of resistant (Hawaii 7996) and susceptible (West Virginia700) tomatoes at  
32 multiple time points after inoculation with *R. solanacearum*. We found that defense pathways in  
33 roots of the resistant Hawaii7996 are activated earlier and more strongly than roots of susceptible  
34 West Virginia700. Further, auxin signaling and transport pathways are suppressed in roots of the  
35 resistant variety. Functional analysis of an auxin transport mutant in tomato confirmed a role for  
36 auxin pathways in bacterial wilt. Together, our results suggest that roots mediate resistance to *R.*  
37 *solanacearum* through genome-wide transcriptomic changes that result in strong activation of  
38 defense genes and alteration of auxin pathways.

39

40 **Key words:** *Ralstonia solanacearum*, root architecture, root disease, tomato, RNA-seq

41

42

43

44

45

46

## 47 INTRODUCTION

48 The soilborne betaproteobacterium *Ralstonia solanacearum* is the causal agent of  
49 bacterial wilt and has been ranked as one of the top 10 most destructive plant bacterial pathogens  
50 of all time (Mansfield et al. 2012). The pathogen infects over 200 plant species in 50 families,  
51 but is particularly devastating to members of the Solanaceae family (Hayward 1991; Huet 2014).  
52 *R. solanacearum* is a vascular pathogen that first colonizes the root surface and subsequently  
53 enters the root of both resistant and susceptible plants through small natural wounds or root tips  
54 (Genin 2010). The bacterium secretes cell wall-degrading enzymes and eventually spreads into  
55 the vascular system where it moves to the shoot via the flow of xylem fluid (Genin 2010; Genin  
56 and Denny 2012). As bacteria multiply, they secrete exopolysaccharide (EPS) (Genin 2010;  
57 Genin and Denny 2012), which likely leads to physical xylem blockage, and aboveground  
58 wilting. Resistant plants are able to delay colonization of the root vasculature (Caldwell et al.  
59 2017), but the molecular responses involved in this delay are not clear. Here we use RNA-seq  
60 and mutant analysis to understand responses to *R. solanacearum* in roots of resistant and  
61 susceptible tomato genotypes.

62 In tomato, resistance to *R. solanacearum* is quantitative (Danesh et al. 1994; Thoquet et  
63 al. 1996a; Thoquet et al. 1996b; Wang et al. 2000; Carmeille et al. 2006; Wang et al. 2013; Kim  
64 et al. 2016), but no quantitative trait loci (QTL) for resistance have been cloned. Microarray  
65 analysis of genes differentially expressed in tomato stems 24 hours after infection showed that *R.*  
66 *solanacearum* activates defense, hormone, and lignin pathways in resistant tomato stems  
67 (Ishihara et al. 2012). Surprisingly, no differentially expressed genes (fold change > 2) were  
68 identified in susceptible stems after infection (Ishihara et al. 2012).

69           Despite the prevalence of soilborne pathogens and root diseases, most work in plant-  
70 pathogen interactions has focused on the aboveground portion of the plant. This is likely due to  
71 the hidden nature of roots, and the visible aboveground disease phenotypes that often result from  
72 root infection. However, recent reports indicate that roots also have a robust immune system that  
73 functions to protect the plant from soilborne pathogens. For example, Arabidopsis roots can  
74 recognize microbe associated molecular patterns (MAMPs) from pathogenic bacteria (Millet et  
75 al. 2010). In addition, roots infected with nematodes, which colonize root cortex tissue, can  
76 activate both MAMP-triggered immunity (MTI) (Teixeira et al. 2016) and effector-triggered  
77 immunity (ETI) (Mitchum et al. 2013; Goverse and Smant 2014). Tomato roots also appear to  
78 mount a defense response to *R. solanacearum* because resistant rootstocks grafted to susceptible  
79 scions result in scions that are resistant to *R. solanacearum* and do not wilt (McAvoy et al. 2012;  
80 Rivard et al. 2012).

81           One approach to uncover the mechanisms of resistance in tomato roots to *R.*  
82 *solanacearum* is the analysis of whole genome transcriptional responses. In resistant and  
83 susceptible accessions of a wild potato species, *Solanum commersonii*, transcriptome analysis 3 –  
84 4 days after inoculation with *R. solanacearum* identified 221 genes in the resistant accession and  
85 644 genes in the susceptible that respond to infection (Chen et al. 2014; Zuluaga et al. 2015). In  
86 both accessions, genes that function in development were primarily downregulated, while those  
87 in the gene ontology category ‘biotic stress’ were mainly upregulated after infection (Zuluaga et  
88 al. 2015). In contrast, in a timecourse of peanut root infection the expression patterns of many  
89 defense genes, including LRR-Kinases and *R* genes were mainly downregulated in both resistant  
90 and susceptible peanut genotypes (Chen et al. 2014). Carbohydrate metabolism was repressed  
91 after infection in roots of both resistant and susceptible peanut roots, but more strongly inhibited

92 in resistant roots (Chen et al. 2014). This suggests that the mechanisms of root-mediated  
93 resistance may differ among plant species.

94 The plant hormone auxin can have both positive and negative effects on plant defense,  
95 (reviewed in (Kazan and Manners 2009; Fu and Wang 2011; Ludwig-Muller 2015)). Plant  
96 resistance to some necrotrophic pathogens requires auxin signaling (Tiryaki and Staswick 2002;  
97 Llorente et al. 2008; Qi et al. 2012), but multiple reports have revealed a relationship between  
98 plant susceptibility to biotrophic pathogens and increased auxin accumulation or signaling  
99 (O'Donnell et al. 2003; Navarro et al. 2006; Chen et al. 2007; Ding et al. 2008; Fu and Wang  
100 2011). Many phytopathogens produce auxin (Spaepen et al. 2007; Ludwig-Muller 2015), and  
101 this probably includes *R. solanacearum* (Valls et al. 2006). Exogenous treatment with auxin or  
102 auxin analogs increases disease symptoms caused by *Pseudomonas syringae* in Arabidopsis  
103 (Navarro et al. 2006; Chen et al. 2007) and increases rice susceptibility to *Xanthomonas oryzae*  
104 pv. *oryzae* (Ding et al. 2008), *X. oryzae* pv *oryzicola* and *Magnaporthe grisea* in rice (Fu and  
105 Wang 2011). In Arabidopsis, overexpression of the AvrRpt2 type III effector from *Pseudomonas*  
106 *syringae* changes auxin-related developmental phenotypes (Chen et al. 2007) through the ability  
107 of AvrRpt2 to promote degradation of an AUX/IAA transcription factor, AXR2/IAA7, which  
108 represses auxin responses (Cui et al. 2013).

109 Suppression of auxin signaling may be particularly important in plant defense against  
110 vascular wilt pathogens. Several Arabidopsis auxin signaling and transport mutants are resistant  
111 to the soilborne vascular wilt pathogen *Fusarium oxysporum* (Kidd et al. 2011), and the walls are  
112 thin (*wat1*) mutant of Arabidopsis is resistant to multiple vascular wilt pathogens, including *R.*  
113 *solanacearum* (Denance et al. 2012). The *wat1* mutant has decreased levels of auxin in roots  
114 (Denance et al. 2012) and the base of stems (Ranocha et al. 2013), and the gene was recently

115 shown to encode a vacuolar auxin transporter . *WATI* is expressed in the root pericycle and  
116 lateral root primordium (Denance et al. 2012), suggesting that auxin homeostasis within these  
117 tissues is particularly important for bacterial wilt resistance.

118 In this study, we aimed to identify the transcriptional response of resistant and susceptible  
119 tomato roots to *R. solanacearum* infection at 24 hours and 48 hours post inoculation (hpi). We  
120 identified the responsive genes in resistant and susceptible accessions independently and  
121 compared the responses. We show that resistant tomato roots activate defense pathways and  
122 terpene biosynthesis genes, and suppress auxin signaling and transport pathways in response to  
123 *R. solanacearum*. In contrast, susceptible tomato roots activate defense response marker genes  
124 later, and at a lower fold change, and genes required for root growth are suppressed by 48 hours  
125 post inoculation. Consistent with our finding that auxin pathways are suppressed in resistant  
126 roots, we show that an auxin transport mutant in a susceptible tomato wild-type background is  
127 resistant to *R. solanacearum*. Our data suggest that tomato roots mediate resistance to *R.*  
128 *solanacearum* in part through the suppression of auxin pathways.

## 129 RESULTS

### 130 *Roots of resistant and susceptible tomato plants have a strong transcriptional response to R.* 131 *solanacearum* infection

132 We utilized resistant Hawaii 7996 and susceptible West Virginia (WV) for our analyses.  
133 H7996 is a variety of cultivated tomato (*S. lycopersicum*) that is resistant to many different *R.*  
134 *solanacearum* strains (Lebeau et al. 2011). WV is an accession of *S. pimpinellifolium*, the closest  
135 wild relative to *S. lycopersicum* (Tomato Genome Sequencing Consortium 2012), and is highly  
136 susceptible to *R. solanacearum*. We chose these genotypes for transcriptomic analysis because  
137 they are the parents of a recombination inbred line population that has been used in multiple

138 QTL (quantitative trait loci) studies (Thoquet et al. 1996a; Wang et al. 2000; Carmeille et al.  
139 2006; Wang et al. 2013) for resistance to *R. solanacearum*. Transcriptomic data may be useful  
140 towards the further identification of genes underlying resistance QTL. Because resistant H7996  
141 (*S. lycopersicum*) and susceptible WV (*S. pimpinellifolium*) are different species, we identified  
142 the response within each species by comparing each time point (24 hpi or 48 hpi) to the 0 hpi  
143 mock control for each genotype.

144 We hypothesized that transcriptional events that promoted defense responses in roots of  
145 resistant plants would occur early, before wilting, but would be non-existent or diminished in  
146 roots of susceptible plants. We inoculated roots using our previously established soil-soak  
147 inoculation method (Caldwell et al. 2017), in which wilting typically begins at 72 – 96 hpi in  
148 WV. We previously performed light and scanning electron microscopy and showed that bacteria  
149 colonize the root of both resistant H7996 and susceptible WV at 24 hpi and 48 hpi at 2.5 cm  
150 below the root-shoot junction (Caldwell et al. 2017). Here, we first tested whole roots to confirm  
151 that *R. solanacearum* colonizes roots of resistant H7996 and susceptible WV at 24 and 48 hpi  
152 (Fig. 1). Plants were grown in potting mix and inoculated with  $10^8$  CFU/ml *R. solanacearum*  
153 K60 at the three-leaf stage as in (Caldwell et al. 2017). Consistent with our previous results, in  
154 three independent experiments, bacteria colonized roots of both resistant H7996 and susceptible  
155 WV at 24 and 48 hpi (Fig. 1). We then used genome wide-RNA seq analysis to identify the *R.*  
156 *solanacearum*-responsive transcriptome of whole roots in resistant H7996 and susceptible WV  
157 tomatoes prior to the onset of wilting at 0, 24, and 48 hpi. Plants were grown and root inoculated  
158 as above. Whole roots were harvested at 0, 24 and 48 hpi. Total RNA from 10 roots was pooled  
159 for each genotype at each time point and was sent to the Purdue Genomics Facility for library  
160 creation and sequencing on the Illumina HiSeq2500 (see Materials and Methods). Reads were

161 mapped by the Purdue Genomics Facility using TopHat2 version 2.0.14 to the *S. lycopersicum*  
162 genome (ITAG2.4).

163 Pairwise comparisons were made between each time point and 0 hpi (mock inoculated  
164 control) to identify transcriptional responses to *R. solanacearum* infection within each genotype.  
165 We classified responsive genes (hereafter ‘differentially expressed genes’ or DEGs) as those that  
166 showed a log<sub>2</sub> fold change > |0.585| and a false discovery rate (FDR) < 0.05. To understand how  
167 the response to *R. solanacearum* infection in resistant and susceptible roots differed, the DEGs at  
168 each time point within a genotype were then compared between genotypes (Fig. 2). The mapping  
169 summary is in Supplementary Table S1, normalized library sizes are in Supplementary Table S2,  
170 raw counts are listed in Supplementary Table S3, and processed edgeR gene expression results  
171 are in Supplementary Table S4. Differential expression analysis showed that within susceptible  
172 roots at 24 hpi, 427 genes were upregulated and 545 downregulated, while within resistant roots  
173 at that time point almost twice as many genes were differentially expressed (957 up and 1029  
174 down) (Fig. 2). At 48 hpi, 1316 genes were upregulated in susceptible roots and 1571 were  
175 downregulated compared to 1265 upregulated in resistant roots and 1419 downregulated. We  
176 used quantitative RT-PCR to validate the differential expression of fifteen genes. These showed  
177 similar expression patterns as identified in our RNA-seq analysis (Supplementary Fig. S1).

178 At each time point, we also examined genes that were up or downregulated only within  
179 resistant H7996 or susceptible WV roots (Fig. 2b, 2c, boxed numbers). We call these genes  
180 ‘exclusive’ genes. Major shifts in numbers of exclusive DEGs were observed in susceptible roots  
181 between 24 and 48 hpi. For example, at 24 hpi, only 92 genes were exclusively upregulated in  
182 susceptible WV roots, compared to 622 genes in resistant H7996 roots. However, by 48 hpi, this  
183 number rose to 594 genes in susceptible WV roots compared to 543 in resistant H7996 roots



184 (Fig. 2). We did not identify any significant DEGs whose expression was upregulated in roots of  
185 resistant H7996 and simultaneously downregulated in susceptible WV (or vice versa) at either  
186 time point.

187 We used Gene Ontology (GO) analysis to understand what biological processes were  
188 affected within roots of resistant H7996 and susceptible WV plants after inoculation. GO  
189 analysis using PANTHER (Huaiyu et al. 2016) showed that in susceptible WV at 24 hpi, only  
190 seven GO terms for biological process are overrepresented ( $P < 0.05$ ) among the 427 genes  
191 upregulated (Supplementary Table S5). These include ‘response to stress’ (GO:0006950;  $P =$   
192  $9.76 \times 10^{-3}$ ) and ‘response to stimulus’ (GO:0050896;  $P = 2 \times 10^{-2}$ ). In contrast, at 24 hpi in roots  
193 of the resistant H7996, 27 biological process GO terms were overrepresented in the 957  
194 upregulated genes (Fig. 3 shows a subset of overrepresented GO categories, all overrepresented  
195 GO categories for all comparisons are in Supplementary Table S5). These included ‘reactive  
196 oxygen species metabolic process’ (GO:0072593;  $P = 6.3 \times 10^{-6}$ ) and ‘cellular detoxification’  
197 (GO:1990748;  $P = 8.7 \times 10^{-6}$ ). Not unexpectedly, the GO category ‘defense responses’ (GO:  
198 0006952;  $P = 2.45 \times 10^{-5}$ ) was identified in upregulated genes in roots of the resistant plant at 24  
199 hpi (Fig. 3), but was not present in upregulated genes of susceptible roots at this time point.

200 Twenty-five biological process GO terms are overrepresented in the 545 downregulated  
201 genes at 24 hpi in susceptible WV roots, including ‘plant-type cell wall organization or  
202 biogenesis’ (GO:0071669;  $P = 2.38 \times 10^{-2}$ ), ‘reactive oxygen species metabolic process’  
203 (GO:0072593;  $P = 3.34 \times 10^{-3}$ ), and ‘cellular detoxification’ (GO:1990748;  $P = 1.69 \times 10^{-4}$ ) (Fig.  
204 4 and Supplementary Table S5). Notably, and as stated above, the latter two GO categories were  
205 both overrepresented in *upregulated* genes in resistant roots at this time point. GO  
206 overrepresentation in downregulated H7996 genes at 24 hpi included ‘regulation of jasmonic

207 acid (JA) mediated signaling pathway' (GO:2000022;  $P = 1.26 \times 10^{-6}$ ) (Fig. 4), consistent with  
208 the downregulation of JA responses in resistant plants after infection with some biotrophic  
209 pathogens (Spoel et al. 2003; Glazebrook 2005; Spoel et al. 2007; Koornneef et al. 2008;  
210 Koornneef and Pieterse 2008).

211 Many of the same trends in GO terms were observed at 48 hpi as at 24 hpi in each  
212 genotype. For example, 'Reactive oxygen species metabolic process' and 'cellular  
213 detoxification' categories were still overrepresented in upregulated genes in the resistant H7996  
214 root at 48 hpi (Fig. 3) ( $P = 5.41 \times 10^{-5}$  and  $P = 3.47 \times 10^{-4}$ , respectively), but were not  
215 overrepresented in upregulated genes of the susceptible WV root at either time point (Fig. 3).  
216 The GO category 'defense response' continued to be overrepresented in upregulated genes of the  
217 resistant H7996 root at 48 hpi ( $P = 2.98 \times 10^{-15}$ ) (Fig. 3). While the 'defense response' category  
218 was not overrepresented at 24 hpi in the root of susceptible WV, it was identified at 48 hpi ( $P =$   
219  $4.27 \times 10^{-20}$ ) in upregulated genes of the susceptible WV root (Fig. 3). In downregulated genes,  
220 'Cell wall organization or biogenesis (GO:0071554)' was overrepresented in susceptible roots at  
221 48 hpi ( $P = 1.46 \times 10^{-4}$ ) (see Supplementary Table S5), while 'JA mediated signaling pathway'  
222 continued to be overrepresented in the resistant H7996 plant at 48 hpi ( $P = 3.78 \times 10^{-3}$ ) (Fig. 4).

### 223 ***Defense gene activation occurs earlier and is stronger in roots of resistant tomato plants***

224 Our GO analysis of genes up and downregulated at each time point showed that roots of  
225 resistant plants activated genes enriched for immune GO categories (such as 'response to biotic  
226 stimulus', 'response to oxidative stress', 'defense response', and 'response to stimulus') earlier in  
227 the resistant H7996 root than in the susceptible WV root (Fig. 3 and 4).

228 To examine this more carefully, we next focused on the expression of specific defense  
229 marker genes in classic defense hormone pathways. We examined genes previously used as  
230 markers for defense responses in resistant H7996 (Milling et al. 2011). The ethylene (ET) marker  
231 gene *PR-Ib* was upregulated only in the resistant H7996 genotype, while *Osmotin* was activated  
232 earlier and with a higher fold change compared to 0 hpi in H7996 compared to WV (Fig. 5a). SA  
233 marker genes were similarly regulated, with *PR-Ia* being exclusively activated in H7996 at 48  
234 hpi, and *Glu-A* was activated more strongly in H7996 compared to susceptible WV at both 24  
235 and 48 hpi.

236 Consistent with JA – SA antagonism (Robert-Seilaniantz et al. 2011; Derksen et al.  
237 2013), and our GO analysis above, marker genes for JA defense responses were repressed in  
238 both resistant H7996 and susceptible WV, but showed greater fold change repression in roots of  
239 the resistant H7996 plants. *ALLENE OXIDE SYNTHASE (AOS)* and *LIPOXYGENASE (LoxA)*  
240 were both downregulated in resistant H7996 after both time points, *LoxA* was also  
241 downregulated in WV (Fig. 5a). This corresponded to the GO enrichment analysis that showed  
242 that regulation of JA mediated signaling was overrepresented in downregulated genes only for  
243 resistant H7996 (Fig. 4). Together, these results reveal activation of SA- and ET- dependent  
244 defense pathways earlier in roots of the resistant plant H7996, as well as an earlier deactivation  
245 of JA-dependent defense signaling in resistant H7996.

246 In addition to these classic defense pathways, we observed strong upregulation of terpene  
247 synthases in resistant tomato roots (Fig. 5b). Terpenoids are a large class of compounds  
248 composed of five carbon isoprene units, and are building blocks of some plant hormones and of  
249 specialized secondary metabolites (Falara et al. 2011). Tomato has 44 terpene synthase (TPS)  
250 genes, of which 29 are functional and are divided into 5 clades (Falara et al. 2011). In roots of

251 resistant plants, five TPS genes in the alpha clade, which encode sesquiterpene synthases  
252 (TPS28, 31, 32, 33, 35), a TPS-like gene, and a linadool/nerolidol synthase (TPS39) are strongly  
253 upregulated at 24 hpi and 48 hpi (Fig. 5b). In contrast, only one sesquiterpene synthase, TPS28,  
254 and the linadool/nerolidol TPS39 are upregulated in susceptible roots at 48 hpi (Fig. 5b).  
255 Terpenoids act as antimicrobial or anti-insect compounds, and the strong upregulation observed  
256 in roots of resistant plants may contribute to resistance.

### 257 ***Roots of susceptible tomato plants downregulate genes required for organ growth at 48 hpi***

258 To have a better understanding of the response within roots of each genotype, we focused  
259 on genes that were exclusively responsive within each time point in each genotype (i.e. genes  
260 that were activated or repressed only within H7996 or WV at each time point, boxed numbers in  
261 Fig. 2b and c). All nine GO terms that overlapped among exclusive genes in WV and H7996  
262 were related to defense and detoxification (Supplementary Fig. S2). Consistent with earlier and  
263 larger fold change defense responses in the resistant H7996 root, all but one of these categories  
264 were found both in genes upregulated in the resistant H7996 root at 24 hpi and genes  
265 downregulated in the susceptible WV root at 24 hpi (Supplementary Fig. S2).

266 Analysis of the 808 genes exclusively downregulated at 48 hpi in susceptible WV roots  
267 revealed several GO categories with known roles in root growth. These included GO categories  
268 ‘DNA replication’ (GO: 0006260;  $P = 8.7 \times 10^{-7}$ ) (Ni et al. 2009; Jia et al. 2016), DNA  
269 packaging (GO:0006323;  $P = 4.4 \times 10^{-10}$ ), chromatin assembly (GO:0031497,  $P = 9.7 \times 10^{-11}$ )  
270 (Shen and Xu 2009; Aichinger et al. 2011; Sang et al. 2012), and translation (GO: 0006412;  $P =$   
271  $3.7 \times 10^{-31}$ ) (Wieckowski and Schiefelbein 2012) (Fig. 6). Genes repressed in these categories  
272 included DNA replication helicases *MCM3* (*Solyc02g070780*), *MCM4* (*Solyc01g110130*),  
273 *MCM5* (*Solyc07g005020*) and *MCM7* (*Solyc01g079500*), ribosomal proteins and histones. In

274 Arabidopsis, *MCM2* is involved in DNA replication and is important for root meristem  
275 maintenance (Ni et al. 2009), and mutations in a DNA helicase/nuclease result in very short roots  
276 (Jia et al. 2016). Further, mutation of *AtMDN1*, an AAA-ATPase that is a component of the pre-  
277 60S ribosome, results in several developmental defects including a shorter root (Li et al. 2016).  
278 Histone modifications have also been shown to be critical for proper root growth and  
279 development (reviewed in Takatsuka and Umeda 2015). None of these GO categories were  
280 identified within differentially expressed genes in the resistant H7996 root (Fig. 6).

281         These data suggested that roots of susceptible plants slow growth after infection. To test  
282 this, we quantified root growth of H7996 and WV at 10 dpi. Plants were removed from pots, and  
283 the root systems were gently washed with water to remove soil. Cleaned roots were scanned and  
284 surface area quantified using a WinRHIZO root scanning and quantification system (Arsenault et  
285 al. 1995). We find that roots of WV have significantly decreased surface area after inoculation  
286 compared to mock-inoculated controls (Fig. 7). In contrast, *R. solanacearum* inoculated roots of  
287 resistant H7996 have no difference in surface area compared to mock-inoculated resistant roots  
288 (Fig. 7). The differential root growth response to *R. solanacearum* between resistant and  
289 susceptible accessions is consistent with the transcriptional changes that we observed.

290         Consistent with the hypothesis that the susceptible WV root, responds to *R.*  
291 *solanacearum* with growth suppression, far fewer GO categories were overrepresented in the set  
292 of exclusively upregulated genes in WV roots at 48 hpi (Supplementary Table S4). Three GO  
293 categories were identified among the 594 number of genes exclusively upregulated in WV,  
294 compared to 72 categories identified among the 808 downregulated genes. Among the three GO  
295 categories overrepresented in the exclusively upregulated genes in WV at 48 hpi was ‘defense  
296 response’ (GO: 0006952;  $P = 1.01 \times 10^{-4}$ ) (Supplementary Table S5). Together these results

297 show that although roots of the susceptible WV plant do eventually activate defense responses,  
298 they are also initiating processes that limit root growth.

### 299 ***Auxin response pathways are altered in roots of resistant plants***

300 GO analysis of genes that were exclusively expressed in roots of the resistant variety  
301 H7996 at each time point revealed that the categories ‘auxin-activated signaling pathway’  
302 (GO:0009734;  $P = 4.3 \times 10^{-2}$ ) and ‘cellular response to auxin stimulus’ (GO: 0071365,  $P = 4.3 \times$   
303  $10^{-2}$ ) were overrepresented in genes exclusively downregulated in the resistant H7996 at 48 hpi  
304 (Fig. 8).

305 Examination of the eight genes within these categories identified three genes encoding  
306 transcription factors known as *AUXIN RESPONSE FACTORs* (*ARFs*), which have both positive  
307 and negative roles in auxin signaling. These included two *S. lycopersicum* orthologs  
308 (*Solyc12g042070* and *Solyc03g118290*) of Arabidopsis *ARF2*, and the *S. lycopersicum* ortholog  
309 of Arabidopsis *ARF4* (*Solyc11g069190*). Of the other five genes within the ‘auxin response’ GO  
310 category, one encoded a PIN auxin transporter (*Solyc10g080880*), three were AUXIN/INDOLE-  
311 3-ACETIC-ACID (AUX/IAA) transcription factors (*Solyc06g008590*, *Solyc06g008580*,  
312 *Solyc01g097290*), and another encoded an uncharacterized gene (*Solyc02g036370*) related to the  
313 REVEILLE1 transcription factor in Arabidopsis.

### 314 ***The tomato auxin transport mutant diageotropica (dgt) is resistant to R. solanacearum***

315 One of the genes within the auxin response GO category above was *Solyc10g080880*,  
316 which encodes a PIN auxin efflux transporter known as SISTER OF PIN1b (SiSoPIN1b). PIN  
317 proteins are the primary auxin efflux transporters in plants and are responsible for polar auxin  
318 transport (Krecek et al. 2009; Adamowski and Friml 2015). In Arabidopsis, mutations in several

319 auxin transporters, including *PIN2*, lead to decreased disease symptoms caused by *Fusarium*  
320 *oxysporum* (Kidd et al. 2011). We hypothesized that tomato genes required for polar auxin  
321 transport function in resistance to *R. solanacearum*. To test this, we examined resistance of the  
322 tomato mutant *diageotropica* (*dgt*) to *R. solanacearum*. *DGT* encodes a cyclophilin that  
323 negatively regulates PIN auxin efflux transporters in tomato (Ivanchenko et al. 2015). Mutations  
324 in *DGT* lead to altered auxin transport and changes to the transcription and/or protein localization  
325 of PINs (Ivanchenko et al. 2015). Root inoculation of the *dgt1-1* mutant and its susceptible wild  
326 type parent, Ailsa Craig (AC), showed that *dgt1-1* was highly resistant to *R. solanacearum*  
327 compared to the wild type parent (Fig. 9). Three independent biological replicates revealed that  
328 mutant plants had consistently less than 10% wilting at 12 dpi. In contrast, the wild type parent  
329 had almost 80% wilting at the same time point.

### 330 **The increased resistance of *dgt1-1* is not due solely to alterations in root architecture**

331 The *dgt1-1* mutant has been previously described as lacking lateral roots (Muday et al.  
332 1995; Oh et al. 2006; Ivanchenko et al. 2015). Because *R. solanacearum* enters the root system  
333 in part through wounds created as lateral roots emerge from the primary root, we questioned  
334 whether the decreased colonization of *R. solanacearum* in *dgt1-1* was due to deficiencies in lateral  
335 root emergence. Previous work showing a lack of lateral roots in *dgt1-1* used plants grown in  
336 agar (Ivanchenko et al. 2015). However, examination of root systems of *dgt1-1* grown in potting  
337 mix revealed that the mutant does produce lateral roots in these conditions (Fig. 10B, arrows),  
338 although roots of *dgt1-1* were still significantly smaller compared to the wild-type parent AC  
339 (Fig. 10).

340 To examine whether the altered root structure was the underlying basis for the increased  
341 resistance, we used petiole inoculation of *R. solanacearum* in the *dgt1-1* and AC mutant. This

342 method bypasses the root system by directly injecting bacteria into the petiole vasculature (Tans-  
343 Kersten et al. 2001; Dalsing and Allen 2014). If decreased lateral root emergence in the *dgt1-1*  
344 mutant were the primary reason for resistance, we would expect that the *dgt1-1* mutant would  
345 show an increased susceptibility using this method. Using petiole inoculation, the *dgt1-1* mutant  
346 did not wilt by 12 dpi, compared to approximately 90% wilting in the wild type AC control (Fig.  
347 11). Together, these results suggest that the enhanced resistance to *R. solanacearum* in the *dgt1-1*  
348 mutant is due to modulation of auxin transport.

## 349 **DISCUSSION**

350 In this manuscript we show that infection with the soilborne pathogen *R. solanacearum*  
351 leads to a strong defense response in tomato roots that includes alteration of auxin pathways.  
352 Analysis of a tomato mutant with defective auxin transport confirmed a role for auxin pathways  
353 in resistance. Susceptible tomato roots are stunted at 6 dpi, and consistent with this, we find  
354 significant suppression of genes required for growth and cellular homeostasis at 24 and 48 hpi.  
355 Additionally, roots of the susceptible variety are slower to activate defense responses, and their  
356 defense responses are lower in magnitude compared to resistant roots.

357 Genome-wide transcriptional responses to *R. solanacearum* in tomato have been  
358 previously examined primarily in aboveground regions of the plant. (Ghareeb et al. 2011;  
359 Ishihara et al. 2012; Kiirika et al. 2013). Ishihara *et al.* 2012 used tomato microarrays to examine  
360 gene expression changes 24 hpi with *R. solanacearum* strain 8107S in stems and leaves of  
361 susceptible tomato cultivar Ponderosa and resistant LS-89. They did not identify any changes in  
362 gene expression at 24 hpi in the susceptible cultivar, and only 143 genes were differentially  
363 expressed in leaves of the resistant cultivar compared to the mock-inoculated controls.  
364 Differences in our results can be explained in part by the region of the plant sampled



365 (aboveground vs. belowground), inoculation method, or the result of differences in the gene  
366 expression profiling method used in each study (microarray vs. RNA-seq). Despite these  
367 differences, several of the genes upregulated in resistant tomato stems were found in similar  
368 pathways as those we identified in roots of resistant H7996, including *PR* genes. In line with the  
369 idea of some overlap in defense responses between below and aboveground regions to *R.*  
370 *solanacearum*, defense marker gene expression in aboveground regions of resistant tomato plants  
371 also occurred earlier and more strongly in resistant H7996 compared to susceptible variety  
372 Bonnie Best (Milling et al. 2011). Together, these data suggest that root defense responses  
373 partially overlap with those in the shoot, but also have unique responses to pathogen attack.

374 We observed a strong upregulation of terpene synthase genes specifically in roots of  
375 resistant plants. Analysis of ginger leaves after rhizome infection with *R. solanacearum* revealed  
376 a similar upregulation of terpene synthases in resistant plants (Prasath et al. 2014). A previous  
377 report (Lin et al. 2014) used virus-induced gene silencing in resistant H7996 to knock down  
378 expression of four TPS genes (*TPS31*, *TPS32*, *TPS33*, and *TPS35*) that were highly upregulated  
379 in our dataset. They found that more silenced plants were colonized by *R. solanacearum* in the  
380 stem, suggesting that TPS silenced lines had decreased tolerance to *R. solanacearum*. These data  
381 suggest that upregulation of TPS genes may contribute to resistance in tomato and ginger.  
382 However, this does not appear to be a mechanism used in all crops, as in peanut, terpenoid  
383 synthase genes were downregulated at 12 hpi after infection in both resistant and susceptible  
384 genotypes (Chen et al. 2014). Indeed, resistance in peanut may operate through different  
385 mechanisms than in tomato, as evidenced in the root of a resistant peanut genotype, in which  
386 many NBS-LRR type resistance genes and genes encoding proteins with a LRR-LRK motif were  
387 mainly downregulated (Chen et al. 2014).

388 Our data show both commonalities and differences in resistance between tomato variety  
389 H7996 and wild potato species *S. commersonii* (Zuluaga et al. 2015). In resistant roots of both  
390 species, more genes with roles in biotic stress were upregulated than downregulated. However, in  
391 contrast to our results, which found overrepresentation of the JA pathway in downregulated  
392 genes of resistant roots, no genes in the JA pathway were downregulated in roots of resistant  
393 potato plants (Zuluaga et al. 2015). Additionally, in resistant wild potato roots, genes in the auxin  
394 pathway were upregulated and none were repressed (Zuluaga et al. 2015), while we observed  
395 overrepresentation of auxin pathways in downregulated genes in resistant tomato roots. These  
396 differences could be the result of differences in species, or to time of inoculation, as we sampled  
397 our plants at an earlier time point (24 and 48 hpi compared to 3 – 4 days).

398 Suppression of auxin biosynthesis, responses and signaling has been associated with  
399 plant resistance to biotrophic or hemi-biotrophic pathogens in multiple pathosystems (reviewed  
400 in (Fu and Wang 2011; Ludwig-Muller 2015)). In Arabidopsis, mutations in several auxin  
401 transporters, including *PIN2* and *AUX1*, reduce disease severity caused by the pathogenic fungus  
402 *Fusarium oxysporum* (Kidd et al. 2011). The *walls are thin (wat1)* mutant of Arabidopsis is  
403 resistant to *R. solanacearum*, has decreased auxin content in roots, suppressed indole  
404 metabolism, and decreased tryptophan in roots at 4 dpi (Denance et al. 2012). *WAT1* encodes a  
405 vacuolar auxin transporter (Ranocha et al. 2013) and appears to modulate both cellular auxin  
406 levels within the vascular tissues as well as whole organ levels of auxin in the root and stem.  
407 Intriguingly, *wat1* is resistant to multiple pathogens that, like *R. solanacearum*, colonize the  
408 vasculature, but not to non-vascular pathogens such as *Pseudomonas syringae* pv. *tomato*  
409 (Denance et al. 2012). Resistance to *R. solanacearum* was dependent on SA, because *wat1 NahG*  
410 plants showed comparable levels of disease to wild type Arabidopsis. The *wat1* mutant was first

411 identified due to a defect in secondary cell wall biosynthesis (Ranocha et al. 2010). Mutations in  
412 genes required for secondary cell wall formation including *CELLULOSE SYNTHASE4*  
413 (*CESA4*)/*IRREGULAR XYLEM5 (IRX5)*, *CESA7/IRX3*, and *CESA8/IRX1*, also lead to enhanced  
414 resistance to *R. solanacearum* in Arabidopsis (Hernandez-Blanco et al. 2007). However, in these  
415 mutants, resistance is independent of the SA pathway, but dependent on ABA responses  
416 (Hernandez-Blanco et al. 2007).

417         Here we showed that genes in auxin pathways, including *SISoPIN1b*, a homolog of the  
418 PIN1 auxin transporter, are overrepresented in exclusively downregulated genes in resistant  
419 tomato roots after *R. solanacearum* infection. We find that a tomato mutant with altered auxin  
420 transport is resistant to *R. solanacearum*. Mutations in tomato *DGT* lead to changes in polar  
421 auxin transport that result in abnormal auxin distribution along the root (Ivanchenko et al. 2006).  
422 Polar auxin transport is crucial for plant development and is mediated by PIN auxin transporters  
423 (reviewed in (Krecek et al. 2009; Adamowski and Friml 2015). Roots are composed of multiple  
424 cell types and tissues that differ in auxin levels (Petersson et al. 2009). In Arabidopsis, most PIN  
425 transporters localize to the plasma membrane on specific faces of the cell, and their localization  
426 varies depending on root cell type (Blilou et al. 2005). The tomato DGT protein regulates levels  
427 and localization of PIN1 and PIN2 transporters in the root (Ivanchenko et al. 2015). In wild type  
428 tomato roots, PIN1 localizes to the rootward face of cells in the root stele (Ivanchenko et al.  
429 2015). The *dgt* mutation leads to decreased PIN1 protein in the stele of root tips. In addition,  
430 expression of *PIN2* is significantly decreased in root tips of the *dgt* mutant and the PIN2 protein  
431 localization is altered (Ivanchenko et al. 2015). Although auxin levels in whole roots of the *dgt*  
432 mutant are greater than those in wild-type plants (Ivanchenko et al. 2006), auxin responses and  
433 signaling in the root vasculature are decreased (Ivanchenko et al. 2015) due to the altered

434 localization of PIN1 and PIN2. How mutations in *DGT* lead to resistance is not entirely clear.  
435 One possibility is that resistance is due to antagonism between auxin and SA. Alternatively, like  
436 *wat1* and other *Arabidopsis* mutants, *dgt* may have altered secondary cell wall structure that  
437 enhances resistance, or may be altered in another auxin-related process that results in enhanced  
438 resistance.

439 Understanding mechanisms of root-mediated resistance is an important step in  
440 developing crops with resistance to soilborne pathogens. Like many other bacterial pathogens, *R.*  
441 *solanacearum* produces auxin (Valls et al. 2006). Whether resistant plants downregulate auxin  
442 pathways to overcome pathogen auxin production, and whether the alteration of auxin transport  
443 is a general feature of root-mediated resistance are intriguing questions whose answers may lead  
444 to new insights into enhancing crop resistance.

## 445 MATERIALS AND METHODS

### 446 Plant growth and *R. solanacearum* K60 inoculation

447 Resistant tomato (*Solanum lycopersicum* L.) accession Hawaii7996 (H7996), susceptible  
448 *S. pimpinellifolium* West Virginia 700 (WV), *digeotropa* (*dgt1-1*; *S. lycopersicum*), and Ailsa  
449 Craig (AC; *S. lycopersicum*) were grown in Propagation Mix (Sun Gro Horticulture) in square  
450 pots containing 25-27g of soil and grown under 16:8 h light, 28° - 30°C in a growth chamber.  
451 The *dgt1-1* mutant has been previously reported (Oh et al. 2006), and we confirmed that the  
452 mutation was present by sequencing the gene. Growth and inoculation of *R. solanacearum* was  
453 as described in (Caldwell et al. 2017). Briefly, *R. solanacearum* strain K60 (phylotype IIA,  
454 sequevar 7) was recovered from a glycerol stock and grown for two days on Casamino Peptone  
455 Agar (CPG) containing 1% triphenyltetrazolium chloride (TZC) at 28°C. Bacteria were

456 harvested with sterile water and resuspended to  $1.0 \times 10^8$  CFU/ml. At the three-leaf stage  
457 (approximately 14 – 17 days after planting), tomato plants were root-inoculated by gently lifting  
458 plants from their growth containers, and then soaking in either inoculum or water to the root-  
459 shoot soil line (approximately 40 ml per plant)(as in Caldwell et al. 2017). After soaking for 5  
460 min, seedlings were transferred back to their growth containers and placed back into a growth  
461 chamber with the conditions above. Dilution plating was used to confirm the concentration of  
462 inoculum after each set of inoculations.

463 For *dgt* and AC resistance tests, wilting was rated daily and scored as the percentage of  
464 leaves per plant wilted. For each of soil-soak and petiole inoculation, average wilting with  
465 standard error are shown for three independent experiments. For soil soak inoculation, each  
466 independent experiment had 8 - 9 plants per genotype, and for petiole inoculation, each  
467 experiment had 3 – 9 plants per genotype. The Area Under the Disease Progress Curve  
468 (AUDPC) was calculated according to (Madden et al. 2007) with percent leaf wilting used as the  
469 disease measure.

#### 470 **Plant colonization assays**

471 Individual plants from both mock and *R. solanacearum* inoculations were removed from  
472 pots, and the soil was gently washed off in a tray of sterilized distilled water. Roots of each plant  
473 were transferred into a 50 ml Falcon tube containing 45 ml of sterilized distilled water, and  
474 further cleaned to remove residual soil by shaking the Falcon tube for 1 minute. This wash was  
475 repeated 5 times. Water from cleaned roots was removed with a dried paper towel and roots were  
476 weighed. Washed, cleaned roots were surface sterilized by dipping in 100% ethanol for 30  
477 seconds, and then flamed quickly to remove residual ethanol. Each surface sterilized root was  
478 ground in 1 ml ddH<sub>2</sub>O with a mortar and pestle, the lysate was centrifuged briefly, and the

479 supernatant was used to determine *R. solanacearum* K60 titer with serial dilutions in ddH<sub>2</sub>O. 100  
480 µl of diluent was plated on CPG plates containing 1% TZC and incubated at 28°C for 48 hours.  
481 Colonies were counted and *R. solanacearum* K60 titer was determined as CFU/g of tissue.  
482 Colonization assays were performed in three independent experiments with three plants per  
483 genotype and time point per experiment. Data did not meet the assumption of normality and the  
484 Mann Whitney Wilcoxon test was performed in RStudio version 0.99.484.

#### 485 **Total RNA extraction and RNA-seq sample preparation**

486 Whole roots from 10 plants of each genotype (H7996 and WV) were harvested at each  
487 time point (0 hour mock-inoculation, 24 hpi, and 48 hpi). Roots from these 10 plants were  
488 pooled for each genotype at each time point in each replicate. Three independent replicates were  
489 performed. Samples were ground into a powder using a mortar and pestle under liquid nitrogen.  
490 100 mg of ground root tissue from each sample was used for total RNA extraction using Trizol  
491 following the manufacturer's instructions (Invitrogen, CA). 50 µg of extracted total RNA was  
492 subjected to RNase-free DNase (Omega, GA) treatment. DNase treated total RNA was further  
493 cleaned using a Nortek column following the manufacturer's instructions (Norgen BioTek Corp.,  
494 Canada). Two µg from each of 18 samples (three time points x two genotypes x three replicates)  
495 were submitted to the Purdue Genomic Center for RNA-seq on the Illumina HiSeq 2500. RNA  
496 quality was determined using an Agilent Nanochip (Agilent, CA) and all samples had a RIN  
497 score of at least 7.8. Stranded mRNA libraries were constructed at the Purdue Genomics Facility  
498 using Illumina's TruSeq Stranded mRNA Sample Preparation kit (Revision E, Oct 2013)  
499 according to the manufacturer's instructions.

#### 500 **RNA-seq data analysis**

501 Illumina paired-end 100 bp RNA sequencing was performed on all samples. A total of  
502 967,730,337 reads were generated after quality filtering and mapping (Supplementary Table S1).  
503 Reads for each of the 18 samples were aligned by the Purdue Genomics Facility to the ITAG2.4  
504 *S. lycopersicum* reference genome using Tophat2 version 2.0.14 (Trapnell et al. 2009). Library  
505 type was set to strand-specific (first strand), mate inner distribution to 300, and mate standard  
506 deviation to 150. Gene expression was measured as the total number of reads for each sample  
507 that uniquely mapped to the reference, binned by gene. Each sample averaged about 54 million  
508 high quality, uniquely aligned reads (Supplementary Table S1). After filtering for low counts  
509 such that at least 3 of the 18 samples had at least 3 counts per million (CPM) per row, a total of  
510 20,641 genes remained for differential expression analysis. Differential gene expression analysis  
511 was performed using the edgeR package (Robinson et al. 2010) in Bioconductor version 3.3. The  
512 edgeR function calcNormFactors was used for library normalization with the default edgeR  
513 trimmed mean of M-values (TMM) method. Normalized library sizes are listed in  
514 Supplementary Table S2. Differentially expressed genes were identified using the glm (General  
515 Linear Model) pipeline in edgeR according to the edgeR documentation. The design matrix was  
516 created with coefficients for the expression level of each group. A group consisted of genotype  
517 and time point (H7996\_0 hour = group 1, H7996\_24 hour = group 2, etc). Common and tagwise  
518 dispersions were estimated with the function estimateDisp function. Multidimensional scaling  
519 (MDS) analysis revealed no batch effect of different replicates (Supplementary Figure S3).

520 Pairwise comparisons were performed between mock 0 hour and 24 hpi, and between  
521 mock 0 hour and 48 hpi within each of H7996 and WV using the contrast argument in the  
522 glmLRT function. Differential expression was determined using the Benjamini-Hochberg false  
523 discovery rate (FDR) multiple testing correction (Benjamini and Hochberg 1995) with an

524 adjusted P-value of 0.05 and a log<sub>2</sub> fold change > |0.585| (corresponds to a fold change of >  
525 |1.5|). Venn diagrams were generated using VENNY 2.1 (Oliveros 2007-2015). Gene ontology  
526 (GO) analysis was performed using the PANTHER GO analysis tool  
527 (<http://www.pantherdb.org/>) (Huaiyu et al. 2016). GO terms are derived from annotations of the  
528 sequenced *S. lycopersicum* genome, Heinz1706 (Tomato Genome Sequencing Consortium  
529 2012). All GO categories shown are for ‘biological process’. Heat maps, including those for GO  
530 figures were visualized with Multiple Experiment Viewer from TM4 (Saeed et al. 2003; Saeed et  
531 al. 2006).

### 532 **cDNA synthesis and qRT-PCR**

533 Total RNA extraction was performed as above from root tissue used in the RNA-seq  
534 analysis. cDNA synthesis and qRT-PCR was performed as in (Kim et al. 2017). Two biological  
535 replicates were used for validation. Briefly, cDNA was reverse-transcribed from 1 µg RNA using  
536 the NEB AMV first strand cDNA synthesis kit as per manufacturer’s instructions. Quantitative  
537 RT-PCR was performed with 1µl of cDNA on a Roche Light Cycler (Roche, CA) with the  
538 following amplification protocol: 50°C for 2 min and 95°C for 2 min followed by 40 cycles of  
539 95°C for 15 sec and 60°C for 1 min. PCR efficiency of the primers ranged from 95 % to 105 %.  
540 *ACTIN* (*Solyc11g005330*) was used as the gene for normalization. *Solyc11g005330* was not  
541 differentially expressed in either H7996 or WV at either time point (Supplemental Table 4). The  
542  $\Delta\Delta C_t$  method (Livak and Schmittgen 2001) was used to calculate fold changes relative to the  
543 internal control and the mock-inoculated control plant. Primer sequences are listed in  
544 Supplementary Table S5.

### 545 **Root architecture measurements**



546 Roots were harvested from mock and *R. solanacearum* -inoculated plants at 6 dpi (AC  
547 and *dgt1-1*) or 10 dpi (WV and H7996). Whole root systems were washed gently in water and  
548 scanned with a calibrated color optical scanner from Regent Instruments, Inc (Quebec, Canada)  
549 and measured using software in the WinRHIZO V. 2016a system (Regent Instruments Inc,  
550 Quebec, Canada) (Arsenault et al. 1995). Data were analyzed with a two-way ANOVA followed  
551 by post-hoc Tukey's honest significant differences (HSD) test using RStudio version 0.99.484.  
552 No transformations were necessary to meet the homogeneity of variance and normality  
553 assumptions. Two independent biological replicates with at least six plants per treatment and  
554 genotype were performed for AC and *dgt1-1*. Three independent biological replicates with at  
555 least 5 roots per treatment and genotype were performed for WV and H7996. Representative  
556 images are shown.

## 557 **ACKNOWLEDGEMENTS**

558 We thank Maria Ivanchenko for the *dgt* mutant, Erin Sparks and members of the Iyer-Pascuzzi  
559 lab for comments on the manuscript, and Pete Pascuzzi for helpful comments on RNA-seq  
560 analysis. This work was funded by a grant from the Foundation for Food and Agriculture  
561 Research, start-up funds from Purdue University, and Hatch funds to AIP, and a NSF Graduate  
562 Research Fellowship DGE-1333468 (to E.F).

## 563 **LITERATURE CITED**

564 Adamowski, M., and Friml, J. 2015. PIN-dependent auxin transport: action, regulation, and  
565 evolution. *Plant Cell* 27:20-32.  
566 Aichinger, E., Villar, C.B., Di Mambro, R., Sabatini, S., and Kohler, C. 2011. The CHD3  
567 chromatin remodeler PICKLE and polycomb group proteins antagonistically regulate  
568 meristem activity in the Arabidopsis root. *Plant Cell* 23:1047-1060.  
569 Arsenault, J.-L., Pouleur, S., Messier, C., and Guay, R. 1995. WinRHIZO, a root-measuring  
570 system with a unique overlap correction method. *HortScience* 30:906.

- 571 Benjamini, Y., and Hochberg, Y. 1995. Controlling the False Discovery Rate: A Practical and  
572 Powerful Approach to Multiple Testing. *J. Royal Stat. Soc. Series B (Methodological)*  
573 57:289-300.
- 574 Blilou, I., Xu, J., Wildwater, M., Willemsen, V., Paponov, I., Friml, J., Heidstra, R., Aida, M.,  
575 Palme, K., and Scheres, B. 2005. The PIN auxin efflux facilitator network controls  
576 growth and patterning in *Arabidopsis* roots. *Nature* 433:39-44.
- 577 Caldwell, D., Kim, B.S., and Iyer-Pascuzzi, A.S. 2017. *Ralstonia solanacearum* Differentially  
578 Colonizes Roots of Resistant and Susceptible Tomato Plants. *Phytopathology* 107:528-  
579 536.
- 580 Carneille, A., Caranta, C., Dintinger, J., Prior, P., Luisetti, J., and Besse, P. 2006. Identification  
581 of QTLs for *Ralstonia solanacearum* race 3-phyloptype II resistance in tomato. *Theor.*  
582 *Appl. Genet.* 113:110-121.
- 583 Chen, Y., Ren, X., Zhou, X., Huang, L., Yan, L., Lei, Y., Liao, B., Huang, J., Huang, S., Wei,  
584 W., and Jiang, H. 2014. Dynamics in the resistant and susceptible peanut (*Arachis*  
585 *hypogaea* L.) root transcriptome on infection with the *Ralstonia solanacearum*. *BMC*  
586 *genomics* 15:1078.
- 587 Chen, Z., Agnew, J.L., Cohen, J.D., He, P., Shan, L., Sheen, J., and Kunkel, B.N. 2007.  
588 *Pseudomonas syringae* type III effector AvrRpt2 alters *Arabidopsis thaliana* auxin  
589 physiology. *Proc Natl Acad Sci U S A* 104:20131-20136.
- 590 Cui, F., Wu, S., Sun, W., Coaker, G., Kunkel, B., He, P., and Shan, L. 2013. The *Pseudomonas*  
591 *syringae* type III effector AvrRpt2 promotes pathogen virulence via stimulating  
592 *Arabidopsis* auxin/indole acetic acid protein turnover. *Plant Physiol.* 162:1018-1029.
- 593 Dalsing, B.L., and Allen, C. 2014. Nitrate assimilation contributes to *Ralstonia solanacearum*  
594 root attachment, stem colonization, and virulence. *J Bacteriol* 196:949-960.
- 595 Danesh, D., Aarons, S., McGill, G.E., and Young, N.D. 1994. Genetic Dissection of Oligogenic  
596 Resistance to Bacterial Wilt in Tomato. *Mol Plant Microbe Interact* 7:464-471.
- 597 Denance, N., Ranocha, P., Oria, N., Barlet, X., Riviere, M.P., Yadeta, K.A., Hoffmann, L.,  
598 Perreau, F., Clement, G., Maia-Grondard, A., van den Berg, G.C., Savelli, B., Fournier,  
599 S., Aubert, Y., Pelletier, S., Thomma, B.P., Molina, A., Jouanin, L., Marco, Y., and  
600 Goffner, D. 2012. *Arabidopsis wat1 (walls are thin1)*-mediated resistance to the bacterial  
601 vascular pathogen, *Ralstonia solanacearum*, is accompanied by cross-regulation of  
602 salicylic acid and tryptophan metabolism. *Plant J.*
- 603 Derksen, H., Rampitsch, C., and Daayf, F. 2013. Signaling cross-talk in plant disease resistance.  
604 *Plant Sci.* 207:79-87.
- 605 Ding, X., Cao, Y., Huang, L., Zhao, J., Xu, C., Li, X., and Wang, S. 2008. Activation of the  
606 indole-3-acetic acid-amido synthetase GH3-8 suppresses expansin expression and  
607 promotes salicylate- and jasmonate-independent basal immunity in rice. *Plant Cell*  
608 20:228-240.
- 609 Falara, V., Akhtar, T.A., Nguyen, T.T., Spyropoulou, E.A., Bleeker, P.M., Schauvinhold, I.,  
610 Matsuba, Y., Bonini, M.E., Schillmiller, A.L., Last, R.L., Schuurink, R.C., and Pichersky,  
611 E. 2011. The tomato terpene synthase gene family. *Plant Physiol.* 157:770-789.
- 612 Fu, J., and Wang, S. 2011. Insights into auxin signaling in plant-pathogen interactions. *Front*  
613 *Plant Sci* 2:74.
- 614 Genin, S. 2010. Molecular traits controlling host range and adaptation to plants in *Ralstonia*  
615 *solanacearum*. *New Phytol.* 187:920-928.

- 616 Genin, S., and Denny, T.P. 2012. Pathogenomics of the *Ralstonia solanacearum* species  
617 complex. *Annu. Rev. Phytopathol.* 50:67-89.
- 618 Ghareeb, H., Bozso, Z., Ott, P.G., Repenning, C., Stahl, F., and Wydra, K. 2011. Transcriptome  
619 of silicon-induced resistance against *Ralstonia solanacearum* in the silicon non-  
620 accumulator tomato implicates priming effect. *Physiol. Mol. Plant Pathol.* 75:83-89.
- 621 Glazebrook, J. 2005. Contrasting mechanisms of defense against biotrophic and necrotrophic  
622 pathogens. *Annu. Rev. Phytopathol.* 43:205-227.
- 623 Goverse, A., and Smant, G. 2014. The activation and suppression of plant innate immunity by  
624 parasitic nematodes. *Annu. Rev. Phytopathol.* 52:243-265.
- 625 Hayward, A.C. 1991. Biology and Epidemiology of Bacterial Wilt Caused by *Pseudomonas-*  
626 *Solanacearum*. *Annu. Rev. Phytopathol.* 29:65-87.
- 627 Hernandez-Blanco, C., Feng, D.X., Hu, J., Sanchez-Vallet, A., Deslandes, L., Llorente, F.,  
628 Berrocal-Lobo, M., Keller, H., Barlet, X., Sanchez-Rodriguez, C., Anderson, L.K.,  
629 Somerville, S., Marco, Y., and Molina, A. 2007. Impairment of cellulose synthases  
630 required for *Arabidopsis* secondary cell wall formation enhances disease resistance. *Plant*  
631 *Cell* 19:890-903.
- 632 Huaiyu, A., Poudel, S., Muruganujan, A., Casagrande, J.T., and Thomas, P.D. 2016. PANTHER  
633 version 10: expanded protein families and functions, and analysis tools. *Nucleic Acids*  
634 *Res.* 44(D1):D336-42.
- 635 Huet, G. 2014. Breeding for resistances to *Ralstonia solanacearum*. *Front Plant Sci.* 5:715.
- 636 Ishihara, T., Mitsuhashi, I., Takahashi, H., and Nakaho, K. 2012. Transcriptome analysis of  
637 quantitative resistance-specific response upon *Ralstonia solanacearum* infection in  
638 tomato. *PLoS One* 7:e46763.
- 639 Ivanchenko, M.G., Coffeen, W.C., Lomax, T.L., and Dubrovsky, J.G. 2006. Mutations in the  
640 *Diageotropica (Dgt)* gene uncouple patterned cell division during lateral root initiation  
641 from proliferative cell division in the pericycle. *Plant J.* 46:436-447.
- 642 Ivanchenko, M.G., Zhu, J., Wang, B., Medvecka, E., Du, Y., Azzarello, E., Mancuso, S.,  
643 Megraw, M., Filichkin, S., Dubrovsky, J.G., Friml, J., and Geisler, M. 2015. The  
644 cyclophilin A *DIAGEOTROPICA* gene affects auxin transport in both root and shoot to  
645 control lateral root formation. *Development* 142:712-721.
- 646 Jia, N., Liu, X., and Gao, H. 2016. A DNA2 Homolog Is Required for DNA Damage Repair,  
647 Cell Cycle Regulation, and Meristem Maintenance in Plants. *Plant Physiol.* 171:318-333.
- 648 Kazan, K., and Manners, J.M. 2009. Linking development to defense: auxin in plant-pathogen  
649 interactions. *Trends Plant Sci.* 14:373-382.
- 650 Kidd, B.N., Kadoo, N.Y., Dombrecht, B., Tekeoglu, M., Gardiner, D.M., Thatcher, L.F., Aitken,  
651 E.A., Schenk, P.M., Manners, J.M., and Kazan, K. 2011. Auxin signaling and transport  
652 promote susceptibility to the root-infecting fungal pathogen *Fusarium oxysporum* in  
653 *Arabidopsis*. *Mol Plant Microbe Interact* 24:733-748.
- 654 Kiirika, L.M., Stahl, F., and Wydra, K. 2013. Phenotypic and molecular characterization of  
655 resistance induction by single and combined application of chitosan and silicon in tomato  
656 against *Ralstonia solanacearum*. *Physiol. Mol. Plant Pathol.* 81:1-12.
- 657 Kim, B.S., French, E., Caldwell, D., Harrington, E.J., and Iyer-Pascuzzi, A.S. 2016. Bacterial  
658 wilt disease: Host resistance and pathogen virulence mechanisms. *Physiol. Mol. Plant*  
659 *Pathol.* 95:37-43.

- 660 Kim, H., Kim, B.S., Shim, J.E., Hwang, S., Yang, S., Kim, E., Iyer-Pascuzzi, A.S., and Lee, I.  
661 2017. TomatoNet: A Genome-wide Co-functional Network for Unveiling Complex Traits  
662 of Tomato, a Model Crop for Fleshy Fruits. *Mol. Plant* 10:652-655.
- 663 Koornneef, A., and Pieterse, C.M. 2008. Cross talk in defense signaling. *Plant Physiol.* 146:839-  
664 844.
- 665 Koornneef, A., Leon-Reyes, A., Ritsema, T., Verhage, A., Den Otter, F.C., Van Loon, L.C., and  
666 Pieterse, C.M. 2008. Kinetics of salicylate-mediated suppression of jasmonate signaling  
667 reveal a role for redox modulation. *Plant Physiol.* 147:1358-1368.
- 668 Krecek, P., Skupa, P., Libus, J., Naramoto, S., Tejos, R., Friml, J., and Zazimalova, E. 2009. The  
669 PIN-FORMED (PIN) protein family of auxin transporters. *Genome Biol.* 10:249.
- 670 Lebeau, A., Daunay, M.C., Frary, A., Palloix, A., Wang, J.F., Dintinger, J., Chiroleu, F., Wicker,  
671 E., and Prior, P. 2011. Bacterial wilt resistance in tomato, pepper, and eggplant: genetic  
672 resources respond to diverse strains in the *Ralstonia solanacearum* species complex.  
673 *Phytopathol.* 101:154-165.
- 674 Li, P.C., Yu, S.W., Li, K., Huang, J.G., Wang, X.J., and Zheng, C.C. 2016. The Mutation of Glu  
675 at Amino Acid 3838 of AtMDN1 Provokes Pleiotropic Developmental Phenotypes in  
676 *Arabidopsis*. *Sci. Rep.* 6:36446.
- 677 Lin, Y.M., Shih, S.L., Lin, W.C., Wu, J.W., Chen, Y.T., Hsieh, C.Y., Guan, L.C., Lin, L., and  
678 Cheng, C.P. 2014. Phytoalexin biosynthesis genes are regulated and involved in plant  
679 response to *Ralstonia solanacearum* infection. *Plant Sci.* 224:86-94.
- 680 Livak, K.J., and Schmittgen, T.D. 2001. Analysis of relative gene expression data using real-time  
681 quantitative PCR and the 2(-Delta Delta C(T)) Method. *Methods* 25:402-408.
- 682 Llorente, F., Muskett, P., Sanchez-Vallet, A., Lopez, G., Ramos, B., Sanchez-Rodriguez, C.,  
683 Jorda, L., Parker, J., and Molina, A. 2008. Repression of the auxin response pathway  
684 increases *Arabidopsis* susceptibility to necrotrophic fungi. *Mol. Plant* 1:496-509.
- 685 Ludwig-Muller, J. 2015. Bacteria and fungi controlling plant growth by manipulating auxin:  
686 balance between development and defense. *J. Plant Physiol.* 172:4-12.
- 687 Madden, L.V., Hughes, G., and Van Den Bosh, F. 2007. *The Study of Plant Disease Epidemics.*  
688 APS Press, Saint Paul, USA.
- 689 Mansfield, J., Genin, S., Magori, S., Citovsky, V., Sriariyanum, M., Ronald, P., Dow, M.,  
690 Verdier, V., Beer, S.V., Machado, M.A., Toth, I., Salmond, G., and Foster, G.D. 2012.  
691 Top 10 plant pathogenic bacteria in molecular plant pathology. *Mol. Plant Pathol.*  
692 13:614-629.
- 693 McAvoy, T., Freeman, J.H., Rideout, S.L., Olson, S.M., and Paret, P.L. 2012. Evaluation of  
694 Grafting Using Hybrid Rootstocks for Management of Bacterial Wilt in Field Tomato  
695 Production. *HortScience* 47:621-625.
- 696 Millet, Y.A., Danna, C.H., Clay, N.K., Songnuan, W., Simon, M.D., Werck-Reichhart, D., and  
697 Ausubel, F.M. 2010. Innate immune responses activated in *Arabidopsis* roots by  
698 microbe-associated molecular patterns. *Plant Cell* 22:973-990.
- 699 Milling, A., Babujee, L., and Allen, C. 2011. *Ralstonia solanacearum* extracellular  
700 polysaccharide is a specific elicitor of defense responses in wilt-resistant tomato plants.  
701 *PLoS One* 6:e15853.
- 702 Mitchum, M.G., Hussey, R.S., Baum, T.J., Wang, X., Elling, A.A., Wubben, M., and Davis, E.L.  
703 2013. Nematode effector proteins: an emerging paradigm of parasitism. *New Phytol.*  
704 199:879-894.

- 705 Muday, G.K., Lomax, T.L., and Rayle, D.L. 1995. Characterization of the growth and auxin  
706 physiology of roots of the tomato mutant, *diageotropica*. *Planta* 195:548-553.
- 707 Navarro, L., Dunoyer, P., Jay, F., Arnold, B., Dharmasiri, N., Estelle, M., Voinnet, O., and  
708 Jones, J.D. 2006. A plant miRNA contributes to antibacterial resistance by repressing  
709 auxin signaling. *Science* 312:436-439.
- 710 Ni, D.A., Sozzani, R., Blanchet, S., Domenichini, S., Reuzeau, C., Cella, R., Bergounioux, C.,  
711 and Raynaud, C. 2009. The Arabidopsis MCM2 gene is essential to embryo development  
712 and its over-expression alters root meristem function. *New Phytol.* 184:311-322.
- 713 O'Donnell, P.J., Schmelz, E.A., Moussatche, P., Lund, S.T., Jones, J.B., and Klee, H.J. 2003.  
714 Susceptible to intolerance--a range of hormonal actions in a susceptible Arabidopsis  
715 pathogen response. *Plant J* 33:245-257.
- 716 Oh, K., Ivanchenko, M.G., White, T.J., and Lomax, T.L. 2006. The *diageotropica* gene of tomato  
717 encodes a cyclophilin: a novel player in auxin signaling. *Planta* 224:133-144.
- 718 Oliveros, J.C. 2007-2015. Venny. An interactive tool for comparing lists with Venn's diagrams. .  
719 <http://bioinfogp.cnb.csic.es/tools/venny/index.html>.
- 720 Petersson, S.V., Johansson, A.I., Kowalczyk, M., Makoveychuk, A., Wang, J.Y., Moritz, T.,  
721 Grebe, M., Benfey, P.N., Sandberg, G., and Ljung, K. 2009. An auxin gradient and  
722 maximum in the Arabidopsis root apex shown by high-resolution cell-specific analysis of  
723 IAA distribution and synthesis. *Plant Cell* 21:1659-1668.
- 724 Prasath, D., Karthika, R., Habeeba, N.T., Suraby, E.J., Rosana, O.B., Shaji, A., Eapen, S.J.,  
725 Deshpande, U., and Anandaraj, M. 2014. Comparison of the transcriptomes of ginger  
726 (*Zingiber officinale* Rosc.) and mango ginger (*Curcuma amada* Roxb.) in response to the  
727 bacterial wilt infection. *PLoS One* 9:e99731.
- 728 Qi, L., Yan, J., Li, Y., Jiang, H., Sun, J., Chen, Q., Li, H., Chu, J., Yan, C., Sun, X., Yu, Y., Li,  
729 C., and Li, C. 2012. Arabidopsis thaliana plants differentially modulate auxin  
730 biosynthesis and transport during defense responses to the necrotrophic pathogen  
731 *Alternaria brassicicola*. *New Phytol.* 195:872-882.
- 732 Ranocha, P., Denance, N., Vanholme, R., Freyrier, A., Martinez, Y., Hoffmann, L., Kohler, L.,  
733 Pouzet, C., Renou, J.P., Sundberg, B., Boerjan, W., and Goffner, D. 2010. Walls are thin1  
734 (WAT1), an Arabidopsis homolog of *Medicago truncatula* NODULIN21, is a tonoplast-  
735 localized protein required for secondary wall formation in fibers. *Plant J.* 63:469-483.
- 736 Ranocha, P., Dima, O., Nagy, R., Felten, J., Corratge-Faillie, C., Novak, O., Morreel, K.,  
737 Lacombe, B., Martinez, Y., Pfrunder, S., Jin, X., Renou, J.-P., Thibaud, J.-P., Ljung, K.,  
738 Fischer, U., Martinoia, E., Boerjan, W., and Goffner, D. 2013. Arabidopsis WAT1 is a  
739 vacuolar auxin transport facilitator required for auxin homeostasis. *Nat. Commun.* 2625.
- 740 Rivard, C.L., O'Connell, S., Peet, M.M., Welker, R.M., and Louws, F.J. 2012. Grafting Tomato  
741 to Manage Bacterial Wilt Caused by *Ralstonia solanacearum* in the Southeastern United  
742 States. *Plant Dis.* 96:973-978.
- 743 Robert-Seilaniantz, A., Grant, M., and Jones, J.D. 2011. Hormone crosstalk in plant disease and  
744 defense: more than just jasmonate-salicylate antagonism. *Annu. Rev. Phytopathol.*  
745 49:317-343.
- 746 Robinson, M.D., McCarthy, D.J., and Smyth, G.K. 2010. edgeR: a Bioconductor package for  
747 differential expression analysis of digital gene expression data. *Bioinformatics* 26:139-  
748 140.

- 749 Saeed, A.I., Bhagabati, N.K., Braisted, J.C., Liang, W., Sharov, V., Howe, E.A., Li, J.,  
750 Thiagarajan, M., White, J.A., and Quackenbush, J. 2006. TM4 microarray software suite.  
751 Methods Enzymol. 411:134-193.
- 752 Saeed, A.I., Sharov, V., White, J., Li, J., Liang, W., Bhagabati, N., Braisted, J., Klapa, M.,  
753 Currier, T., Thiagarajan, M., Sturn, A., Snuffin, M., Rezantsev, A., Popov, D., Ryltsov,  
754 A., Kostukovich, E., Borisovsky, I., Liu, Z., Vinsavich, A., Trush, V., and Quackenbush,  
755 J. 2003. TM4: a free, open-source system for microarray data management and analysis.  
756 BioTechniques 34:374-378.
- 757 Sang, Y., Silva-Ortega, C.O., Wu, S., Yamaguchi, N., Wu, M.F., Pfluger, J., Gillmor, C.S.,  
758 Gallagher, K.L., and Wagner, D. 2012. Mutations in two non-canonical Arabidopsis  
759 SWI2/SNF2 chromatin remodeling ATPases cause embryogenesis and stem cell  
760 maintenance defects. Plant J. 72:1000-1014.
- 761 Shen, W.H., and Xu, L. 2009. Chromatin remodeling in stem cell maintenance in Arabidopsis  
762 thaliana. Mol. Plant 2:600-609.
- 763 Spaepen, S., Vanderleyden, J., and Remans, R. 2007. Indole-3-acetic acid in microbial and  
764 microorganism-plant signaling. FEMS Microbiol. Rev. 31:425-448.
- 765 Spoel, S.H., Johnson, J.S., and Dong, X. 2007. Regulation of tradeoffs between plant defenses  
766 against pathogens with different lifestyles. Proc. Natl. Acad. Sci. U. S. A. 104:18842-  
767 18847.
- 768 Spoel, S.H., Koornneef, A., Claessens, S.M., Korzelius, J.P., Van Pelt, J.A., Mueller, M.J.,  
769 Buchala, A.J., Metraux, J.P., Brown, R., Kazan, K., Van Loon, L.C., Dong, X., and  
770 Pieterse, C.M. 2003. NPR1 modulates cross-talk between salicylate- and jasmonate-  
771 dependent defense pathways through a novel function in the cytosol. Plant Cell 15:760-  
772 770.
- 773 Takatsuka, H., and Umeda, M. 2015. Epigenetic Control of Cell Division and Cell  
774 Differentiation in the Root Apex. Front Plant Sci. 6:1178.
- 775 Tans-Kersten, J., Huang, H., and Allen, C. 2001. *Ralstonia solanacearum* needs motility for  
776 invasive virulence on tomato. J Bacteriol. 183:3597-3605.
- 777 Teixeira, M.A., Wei, L., and Kaloshian, I. 2016. Root-knot nematodes induce pattern-triggered  
778 immunity in *Arabidopsis thaliana* roots. New Phytol. 211:276-287.
- 779 Thimm, O., Blasing, O., Gibon, Y., Nagel, A., Meyer, S., Kruger, P., Selbig, J., Muller, L.A.,  
780 Rhee, S.Y., and Stitt, M. 2004. MAPMAN: a user-driven tool to display genomics data  
781 sets onto diagrams of metabolic pathways and other biological processes. Plant J. 37:914-  
782 939.
- 783 Thoquet, P., Olivier, J., Sperisen, C., Rogowsky, P., Laterrot, H., and Grimsley, N. 1996a.  
784 Quantitative trait loci determining resistance to bacterial wilt in tomato cultivar  
785 Hawaii7996. Mol. Plant-Microbe Interact. 9:826-836.
- 786 Thoquet, P., Olivier, J., Sperisen, C., Rogowsky, P., Prior, P., Anais, G., Mangin, B., Bazin, B.,  
787 Nazer, R., and Grimsley, N. 1996b. Polygenic resistance of tomato plants to bacterial wilt  
788 in the French West Indies. Mol. Plant-Microbe Interact. 9:837-842.
- 789 Tiryaki, I., and Staswick, P.E. 2002. An Arabidopsis mutant defective in jasmonate response is  
790 allelic to the auxin-signaling mutant axr1. Plant Physiol. 130:887-894.
- 791 Tomato Genome Consortium. 2012. The tomato genome sequence provides insights into fleshy  
792 fruit evolution. Nature 485:635-641.
- 793 Trapnell, C., Pachter, L., and Salzberg, S.L. 2009. TopHat: discovering splice junctions with  
794 RNA-Seq. Bioinformatics 25:1105-1111.

- 795 Valls, M., Genin, S., and Boucher, C. 2006. Integrated regulation of the type III secretion system  
796 and other virulence determinants in *Ralstonia solanacearum*. PLoS Pathog. 2:e82.
- 797 Wang, J.-F., Ho, F.-I., Truong, H.T.H., Huan, S.-M., Balatero, C.H., Dittapongpitch, V., and  
798 Hidayati, N. 2013. Identification of major QTLs associated with stable resistance of  
799 tomato cultivar 'Hawaii 7996' to *Ralstonia solanacearum*. Euphytica 190:241-252.
- 800 Wang, J.F., Olivier, J., Thoquet, P., Mangin, B., Sauviac, L., and Grimsley, N.H. 2000.  
801 Resistance of tomato line Hawaii7996 to *Ralstonia solanacearum* Pss4 in Taiwan is  
802 controlled mainly by a major strain-specific locus. Mol. Plant-Microbe Interact. 13:6-13.
- 803 Wieckowski, Y., and Schiefelbein, J. 2012. Nuclear ribosome biogenesis mediated by the  
804 DIM1A rRNA dimethylase is required for organized root growth and epidermal  
805 patterning in Arabidopsis. Plant Cell 24:2839-2856.
- 806 Zuluaga, A.P., Sole, M., Lu, H., Gongora-Castillo, E., Vaillancourt, B., Coll, N., Buell, C.R., and  
807 Valls, M. 2015. Transcriptome responses to *Ralstonia solanacearum* infection in the  
808 roots of the wild potato *Solanum commersonii*. BMC Genomics 16:246.

809

## 810 **SEQUENCE DATA**

811 All RNA-seq data in this study has been submitted to the Short Read Archive (SRA) at NCBI  
812 under project number SRP078159. The SRA does not provide pre-release access to sequence  
813 data, but a reviewer link to the metadata is here: [ftp://ftp-](ftp://ftp-trace.ncbi.nlm.nih.gov/sra/review/SRP078159_20170811_115714_3d522deaf85577451c01974654b36ad3)

814 [trace.ncbi.nlm.nih.gov/sra/review/SRP078159\\_20170811\\_115714\\_3d522deaf85577451c019746](ftp://ftp-trace.ncbi.nlm.nih.gov/sra/review/SRP078159_20170811_115714_3d522deaf85577451c01974654b36ad3)  
815 [54b36ad3](ftp://ftp-trace.ncbi.nlm.nih.gov/sra/review/SRP078159_20170811_115714_3d522deaf85577451c01974654b36ad3)

## 816 **SUPPORTING INFORMATION LEGENDS**

817 Supplementary Fig. S1: Comparison of qRT-PCR and RNA-seq data at 24 and 48 hpi after  
818 inoculation in H7996 and WV. Two biological replicates were used for the qRT-PCR analysis.  
819 Expression of genes is shown for both genotypes and time points only if the gene expression was  
820 significant ( $FC > 1.5$ ,  $q < 0.05$ ) in the RNA-seq data. Error bars show standard deviation for  
821 qRT-PCR data.

822 Supplementary Fig. S2: GO categories that are found in more than one 'Exclusive gene' list.

823 Supplementary Fig. S3: Multidimensional Scaling (MDS) plot of RNA-seq samples. To examine  
824 the tomato root response to *R. solanacearum* inoculation within resistant H7996 and susceptible  
825 WV, differentially expressed genes were identified from two comparisons within each genotype:  
826 1) 24 hpi to 0 hour and 2) 48 hpi to 0 hour.

827 Supplementary Table S1: Mapping summary showing numbers of raw reads, quality and adaptor  
828 clipped reads, TopHat mapping percentage for each of the 18 RNA-seq samples, and specified  
829 options in TopHat.

830 Supplementary Table S2: Normalized library sizes

831 Supplementary Table S3: Raw counts of RNA-seq data.

832 Supplementary Table S4: Mean CPMs, log Fold Changes, logCPMs, LR, P values and FDR  
833 values from edgeR.

834 Supplementary Table S5: Gene Ontology (GO) categories for biological process from  
835 PANTHER for each time point comparison.

836 Supplementary Table S6: Primers used for qRT-PCR analysis.

### 837 **FIGURE LEGENDS**

838 Fig. 1: Root colonization of *R. solanacearum* K60 in whole roots of resistant H7996 and  
839 susceptible WV. Plants were grown in potting mix and root inoculated via soil soaking at the  
840 three-leaf stage. The average of three independent replicates, each with roots of three plants per  
841 genotype and time point, is shown. Error bars indicate standard deviation. \* =  $P < 0.05$  with the  
842 Mann Whitney Wilcoxon test.



843 Fig. 2: Summary of DEGs from pairwise comparisons between time points within each genotype  
844 (H7996 or WV). A) Numbers of DEGs at each pairwise comparison within each genotype.  
845 Threshold for differential expression is  $\log_2$  fold change  $> |0.585|$ , False Discovery Rate (FDR)  
846  $< 0.05$ . (B and C) Venn Diagram of up- and downregulated DEGs at 24 hpi (B) and 48 hpi (C)  
847 showing overlap between the responses of resistant *Solanum lycopersicum* L.) variety  
848 Hawaii7996 (H7996) and susceptible *S. pimpinellifolium* West Virginia 700 (WV) . Boxed  
849 numbers show ‘exclusive’ genes at each time point.

850 Fig. 3: GO categories overrepresented (corrected P-value  $< 0.05$ ) in the set of upregulated genes  
851 at each time point. Only categories that contain less than 600 total *S. lycopersicum* genes are  
852 shown in the figure (all categories are in Supplementary Table S5). WV 24 = 24 – 0 hpi  
853 comparison, WV 48 = 48 – 0 hpi comparison etc. No GO categories with less than 600 total  
854 genes are overrepresented in WV\_24 upregulated genes.

855 Fig. 4: GO categories overrepresented (corrected P-value  $< 0.05$ ) in the set of downregulated  
856 genes at each time point. Only categories that contain less than 300 total *S. lycopersicum* genes  
857 are shown in the figure (all categories are in Supplementary Table S5). WV 24 = 24 – 0 hpi  
858 comparison, WV 48 = 48 – 0 hpi comparison etc.

859 Fig. 5: Defense responses are activated earlier and with higher fold changes in the root of  
860 resistant H7996. A) log fold changes in RNA-seq data of marker genes for classic defense  
861 hormones, B) Heat map showing log fold changes of genes in the ‘terpenoid’ bin in MapMan  
862 software (Thimm et al. 2004). More terpene synthase (TPS) genes are activated in roots of  
863 resistant plants and at an earlier time point.

864 Fig. 6: Roots of susceptible plants strongly repress pathways required for organ growth at 48 hpi.  
865 Heatmap of selected overrepresented GO categories (corrected  $P < 0.05$ ) in up- and  
866 downregulated genes in roots of susceptible WV at 24 and 48 hpi. All GO categories in  
867 Supplementary Table 5. No overrepresented categories were observed in WV24\_EX\_UP.

868 Fig. 7: Root architecture of resistant H7996 and susceptible WV at 10 dpi. A) *R. solanacearum*  
869 (*Rs*) and mock-inoculated roots at 10 dpi imaged with a flatbed scanner. Representative images  
870 from three independent experiments, each with at least five roots per genotype and treatment, are  
871 shown, B) Quantification of whole root surface area using the WinRHIZO software image  
872 analysis system (Arsenault et al. 1995). Letters indicate significant differences ( $P < 0.05$ ) with a  
873 two-way ANOVA and Tukey's HSD test.

874 Fig. 8: Auxin-related and lateral root development genes are differentially expressed in the  
875 resistant root at 48 hpi. Selected GO categories overrepresented among genes exclusively  
876 differentially expressed in H7996 at each of the time points shown. The blue box highlights  
877 auxin-related GO categories. The nine categories that overlapped between H7996 and WV are  
878 shown in Supplementary Fig. 2 and are not shown here.

879 Fig. 9 The *dgt1-1* mutant shows enhanced resistance to *R. solanacearum* compared to its wild  
880 type control AC with root soaking inoculation. Wilting was scored daily based on the percentage  
881 of leaves wilted per plant. Each point represents the average of three independent experiments,  
882 each with 8 - 9 plants per genotype. Area Under the Disease Progress Curve (AUDPC) for AC =  
883  $725.2 \pm 85.2$  and for *dgt1-1* =  $60 \pm 64.2$  ( $P < 0.001$  with a two-tailed t-test). Error bars indicate  
884 standard deviation.

885 Fig. 10: Root architecture of susceptible AC and resistant *dgt1-1* at 6 dpi grown in potting mix  
886 and soil-soak inoculated with either water (mock) or *R. solanacearum* strain K60 (*Rs*). A) Plants  
887 were grown in potting mix and roots imaged with a flatbed scanner, B) Close-up images of *dgt1-*  
888 *1* plants in (A). Arrows point to examples of lateral roots. Images are representative of those  
889 from two independent biological replicates with six plants per replicate per treatment and  
890 genotype. Scale bars = 5 cm.

891 Fig. 11: The *dgt1-1* mutant shows enhanced resistance to *R. solanacearum* compared to its wild  
892 type susceptible parent AC with petiole inoculation. Wilting was scored daily based on the  
893 percentage of leaves wilted per plant. The experiment was repeated three times with 3 – 9 plants  
894 of each genotype per experiment. The average of three experiments is shown. The average Area  
895 Under the Disease Progress Curve (AUDPC) for AC =  $401.6 \pm 154.8$ ; average AUDPC for *dgt1-*  
896 *1* =  $0 \pm 0$  ( $P < 0.01$ ; two-tailed t-test with unequal variance). Error bars represent standard  
897 deviation.

898

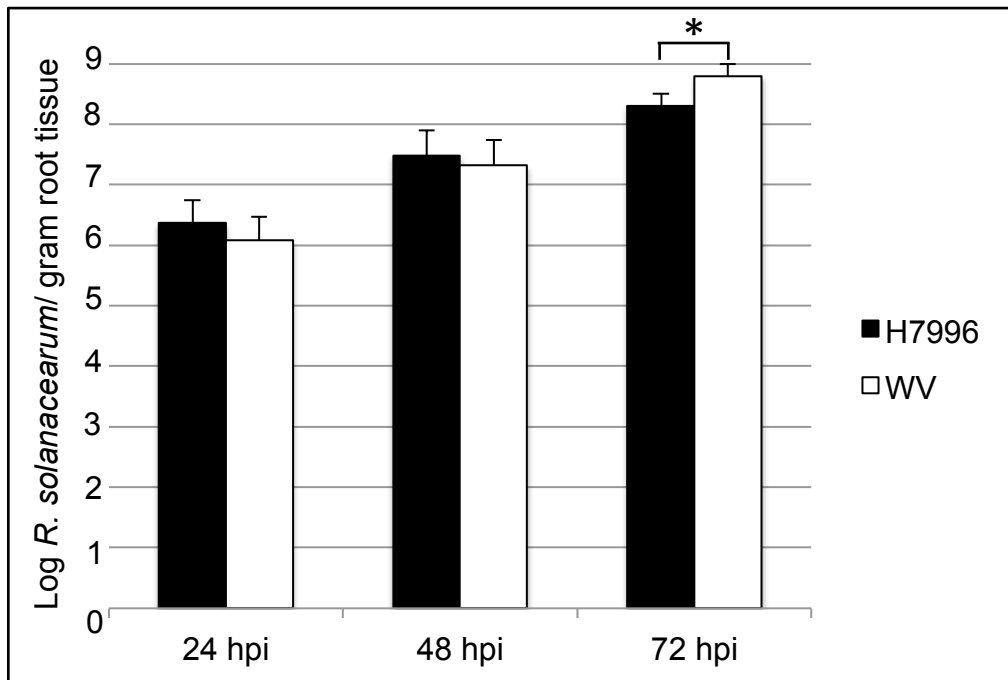

Fig. 1: Root colonization of *R. solanacearum* K60 in whole roots of resistant H7996 and susceptible WV. Plants were grown in potting mix and root inoculated via soil soaking at the three-leaf stage. The average of three independent replicates, each with roots of three plants per genotype and time point, is shown. Error bars show standard deviation. \* =  $P < 0.05$  with the Mann Whitney Wilcoxon test.

| A<br>Comparison     | log <sub>2</sub> FC > 0.585, FDR < 0.05 |      |
|---------------------|-----------------------------------------|------|
|                     | UP                                      | DN   |
| WV 24-0h            | 427                                     | 545  |
| WV 48-0h            | 1316                                    | 1571 |
| Exclusive WV 24h    | 92                                      | 165  |
| Exclusive WV 48h    | 594                                     | 808  |
| H7996 24-0h         | 957                                     | 1029 |
| H7996 48-0h         | 1265                                    | 1419 |
| Exclusive H7996 24h | 622                                     | 649  |
| Exclusive H7996 48h | 543                                     | 656  |

Fig. 2: Summary of DEGs from pairwise comparisons between time points within each genotype (H7996 or WV). A) Numbers of DEGs at each pairwise comparison within each genotype. Threshold for differential expression is log<sub>2</sub> fold change > |0.585|, False Discovery Rate (FDR) < 0.05. (B and C) Venn Diagram of up- and downregulated DEGs at 24 hpi (B) and 48 hpi (C) showing overlap between the responses of resistant H7996 and susceptible WV. Boxed numbers show 'exclusive' genes at each time point.

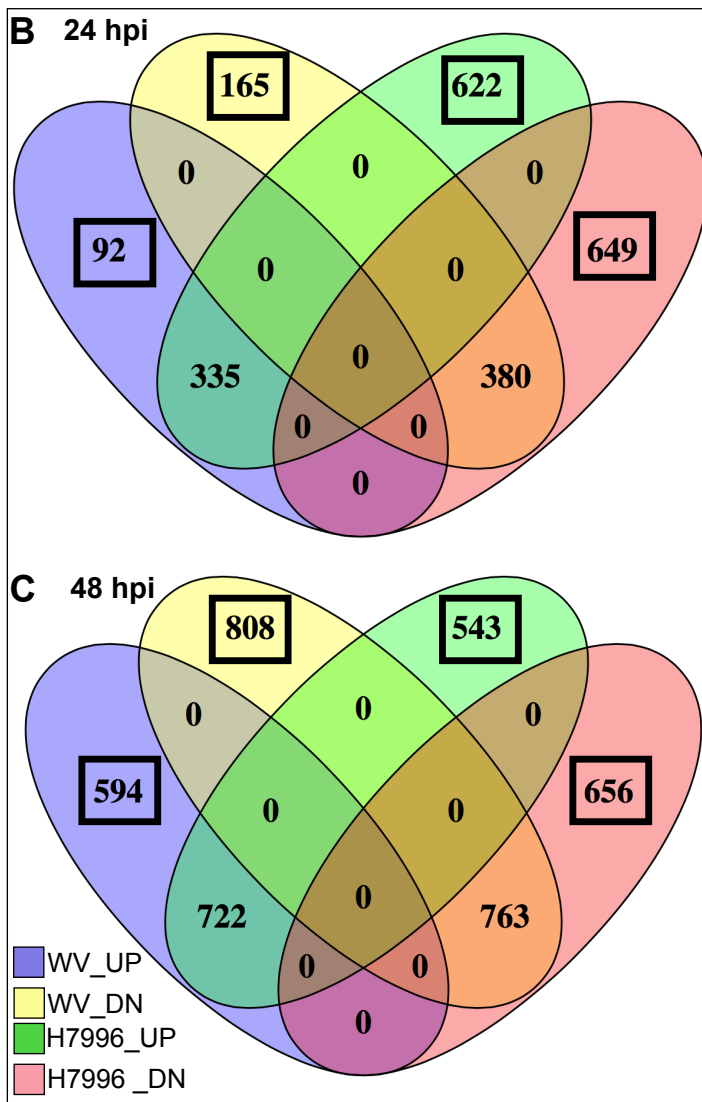

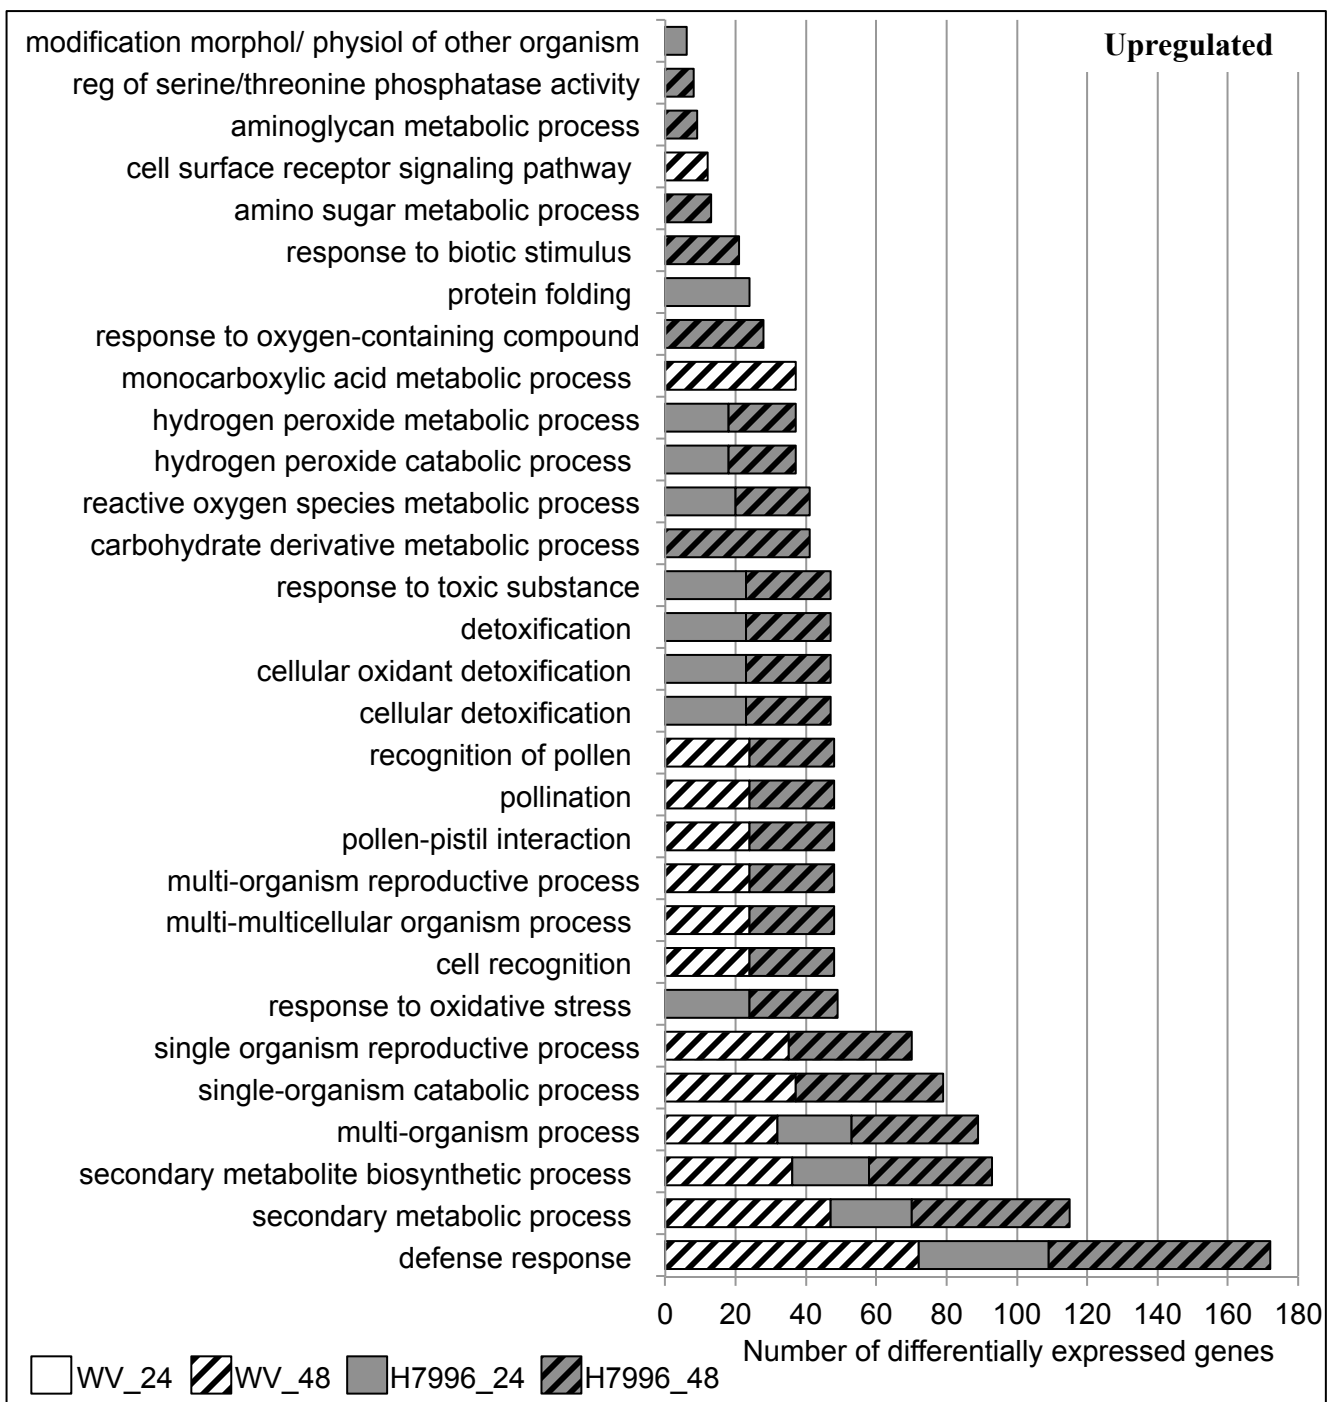

Fig. 3: GO categories overrepresented (corrected P-value < 0.05) in the set of upregulated genes at each time point. Only categories that contain less than 600 total *S. lycopersicum* genes are shown in the figure (all categories are in Supplementary Table S5). WV 24 = 24 – 0 hpi comparison, WV 48 = 48 – 0 hpi comparison etc. No GO categories with less than 600 total genes are overrepresented in WV\_24 upregulated genes.

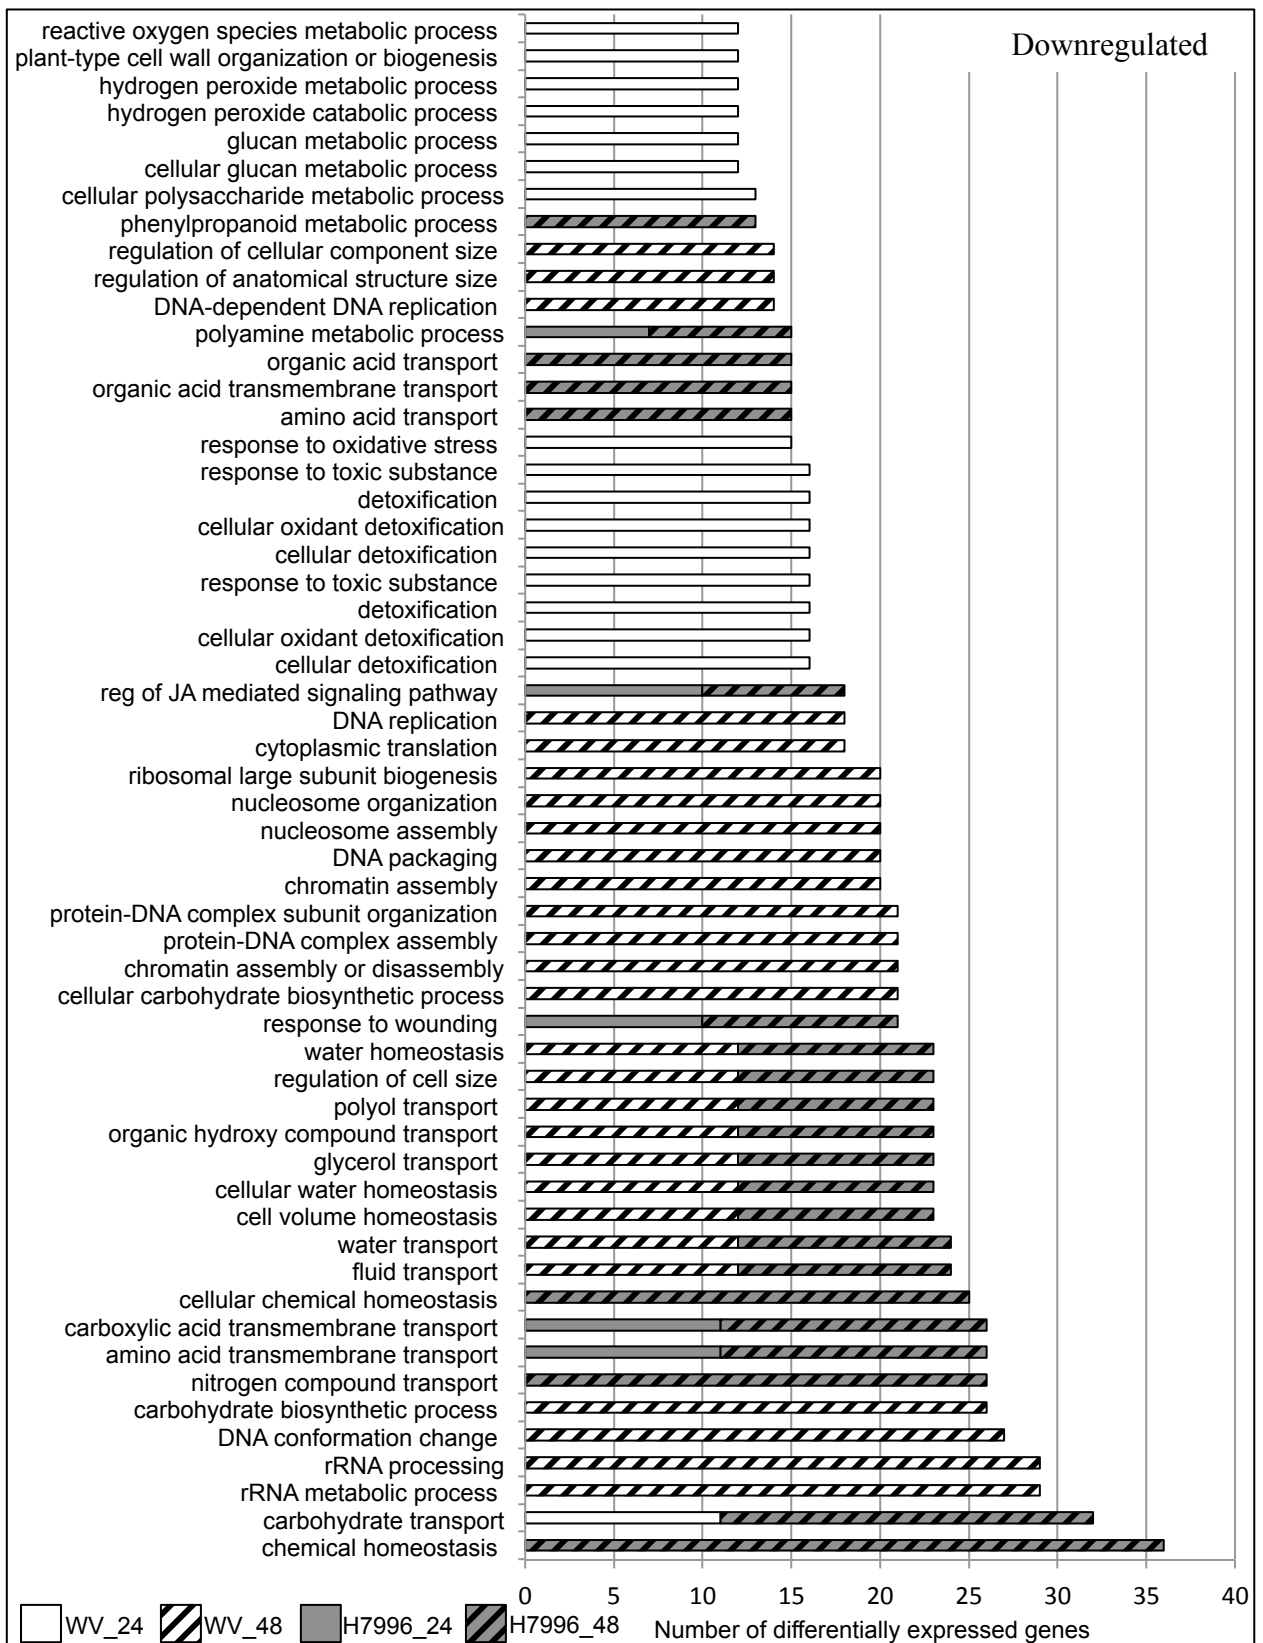

Fig. 4: GO categories overrepresented (corrected P-value < 0.05) in the set of downregulated genes at each time point. Only categories that contain less than 300 total *S. lycopersicum* genes are shown in the figure (all categories are in Supplementary Table S5). WV 24 = 24 – 0 hpi comparison, WV 48 = 48 – 0 hpi comparison etc.

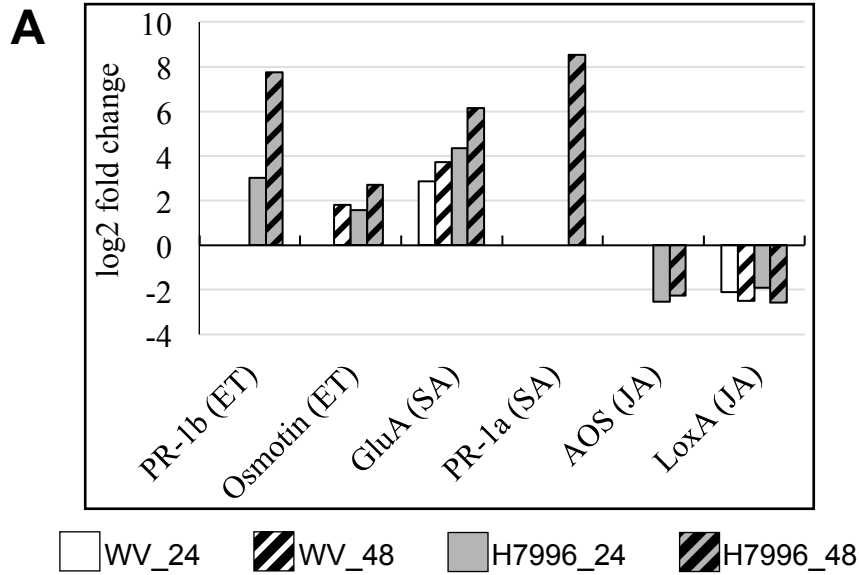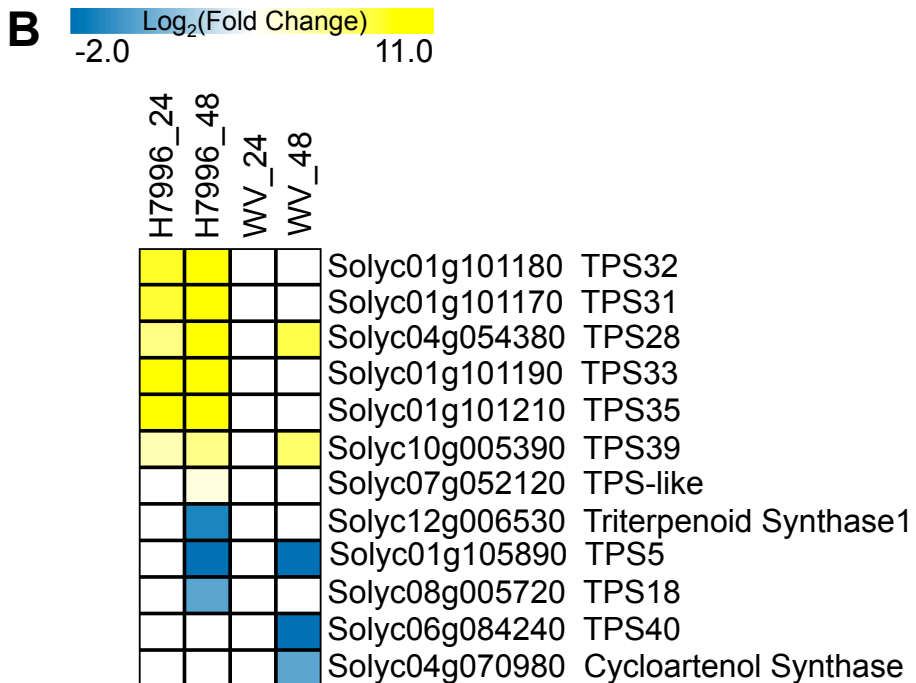

Fig 5: Defense responses are activated earlier and with higher fold changes in the root of resistant H7996. A) log fold changes in RNA-seq data of marker genes for classic defense hormones, B) Heat map showing log fold changes of genes in the ‘terpenoid’ bin in MapMan software (Thimm et al. 2004). More terpene synthase (TPS) genes are activated in roots of resistant plants and at an earlier time point.



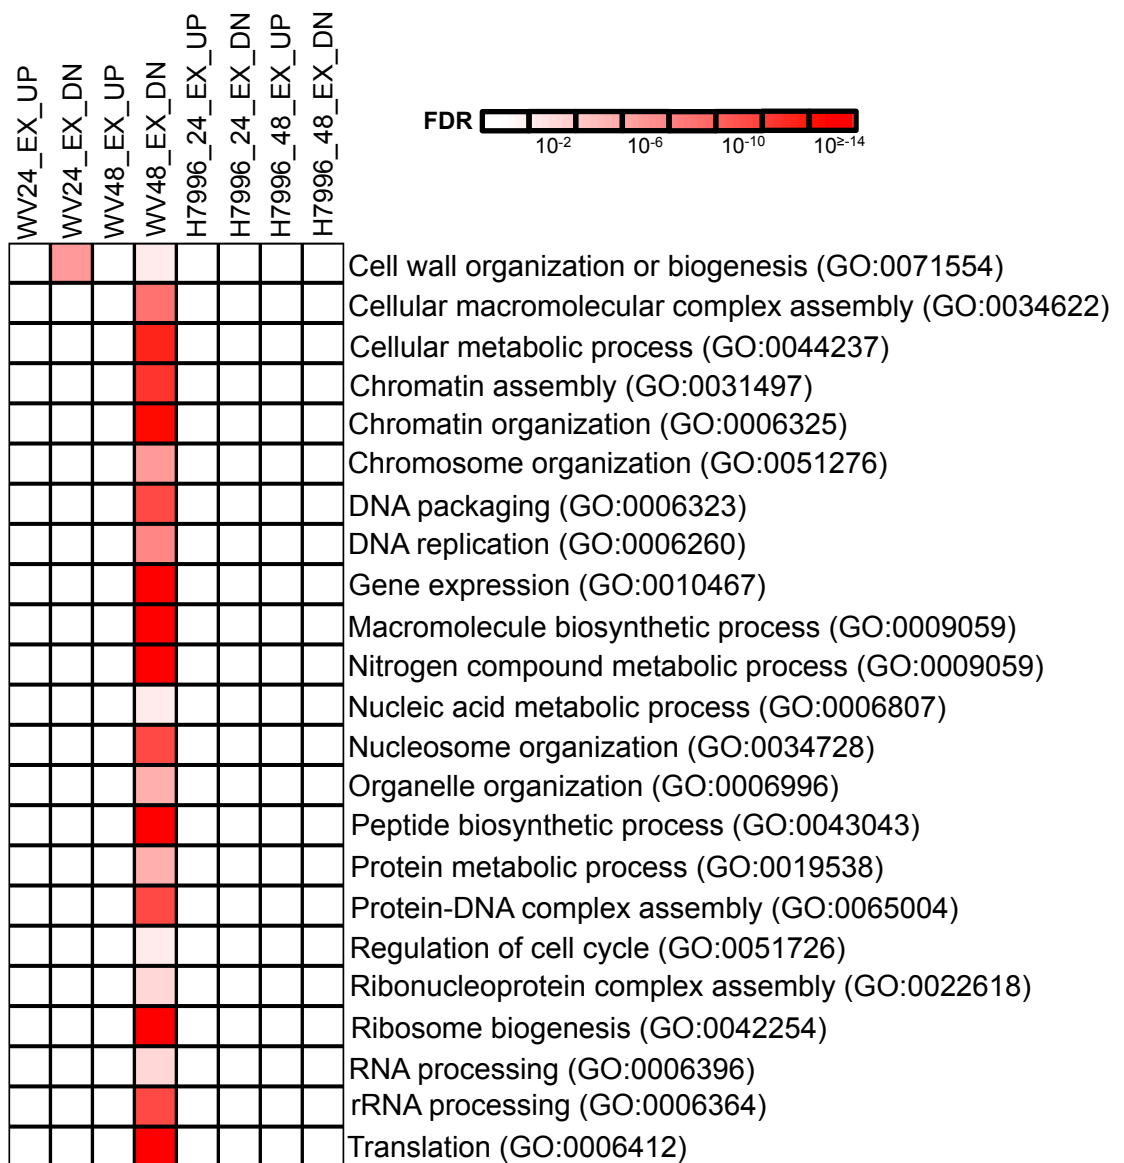

Fig. 6: Roots of susceptible plants strongly repress pathways required for organ growth at 48 hpi. Heatmap of selected overrepresented GO categories (corrected  $P < 0.05$ ) in up- and downregulated genes in roots of susceptible WV at 24 and 48 hpi. All GO categories in Supplementary Table 5. No overrepresented categories were observed in WV24\_EX\_UP.

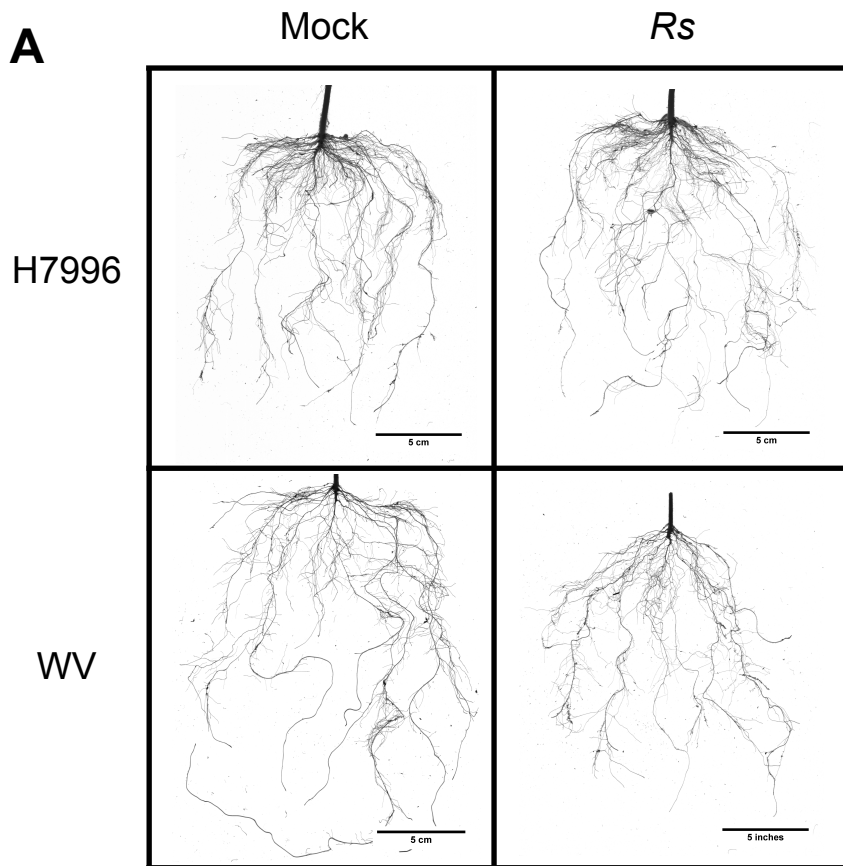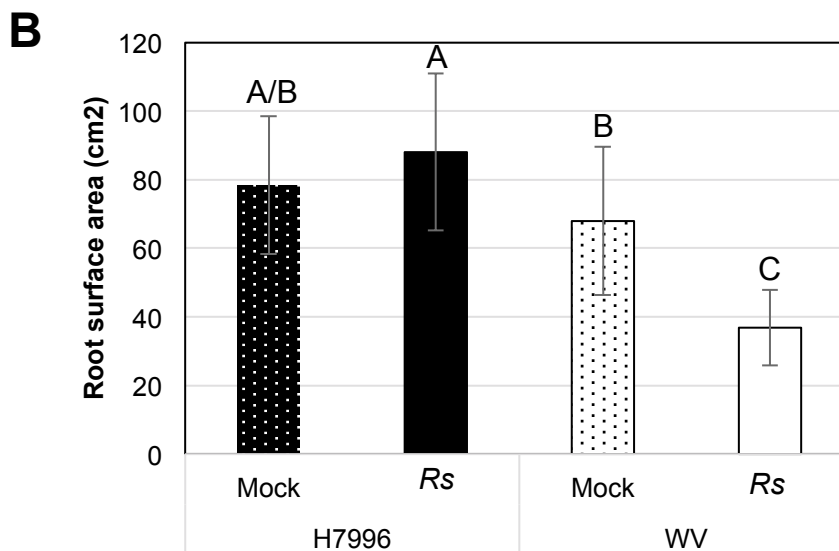

Fig. 7: Root architecture of resistant H7996 and susceptible WV at 10 dpi. A) *R. solanacearum* (*Rs*) and mock-inoculated roots at 10 dpi imaged with a flatbed scanner. Representative images from three independent experiments, each with at least five roots per genotype and treatment, are shown, B) Quantification of whole root surface area using the WinRhizo software image analysis system (Arsenault et al. 1995). Letters indicate significant differences ( $P < 0.05$ ) with a two-way ANOVA and Tukey's HSD test.

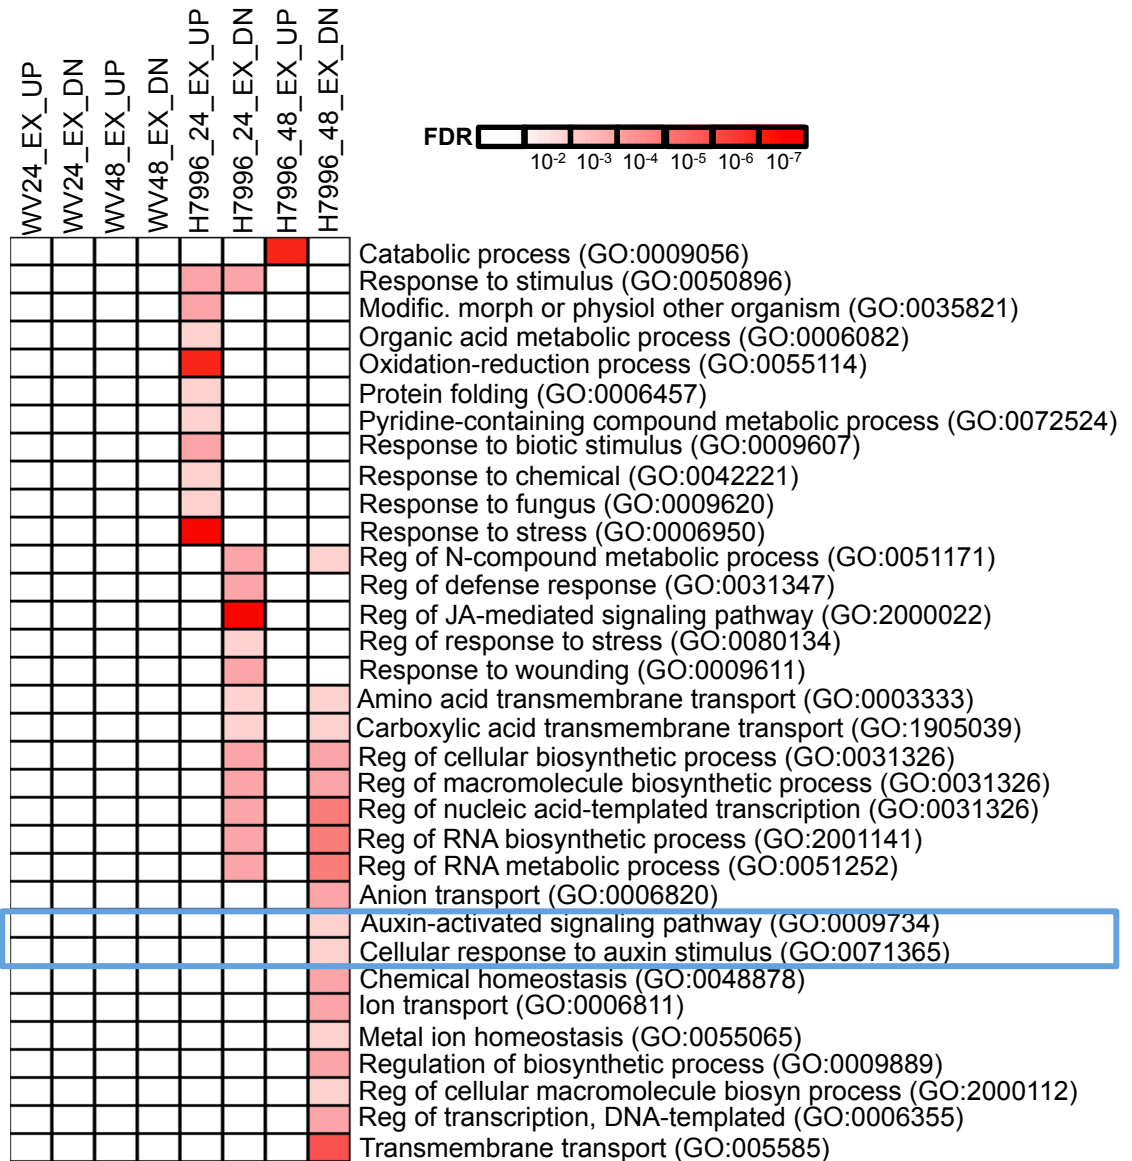

Fig. 8: Auxin-related and lateral root development genes are differentially expressed in the resistant root at 48 hpi. Selected GO categories overrepresented among genes exclusively differentially expressed in H7996 at each of the time points shown. The blue box highlights auxin-related GO categories. The nine categories that overlapped between H7996 and WV are shown in Supplementary Fig. 2 and are not shown here.

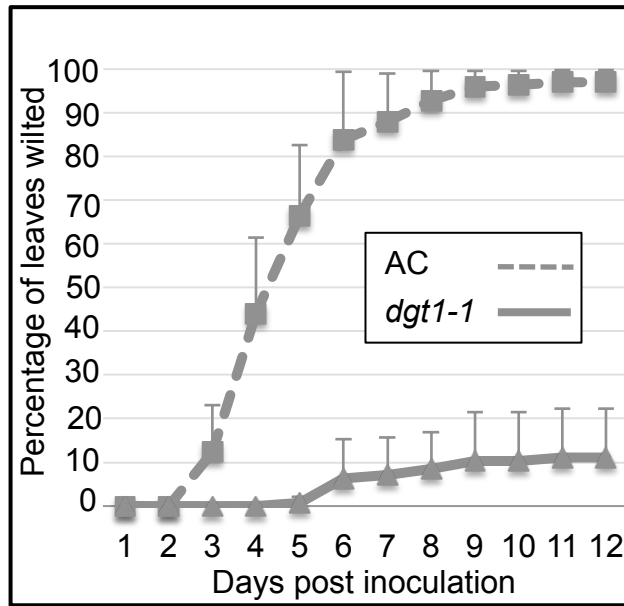

Fig. 9: The *dgt1-1* mutant shows enhanced resistance to *R. solanacearum* compared to its wild type control AC with root soaking inoculation. Wilting was scored daily based on the percentage of leaves wilted per plant. Each point represents the average of three independent experiments, each with 8 - 9 plants per genotype. Area Under the Disease Progress Curve (AUPDC) for AC =  $725.2 \pm 85.2$  and for *dgt1-1* =  $60 \pm 64.2$  ( $P < 0.001$  with a two-tailed t-test). Error bars indicate standard deviation.

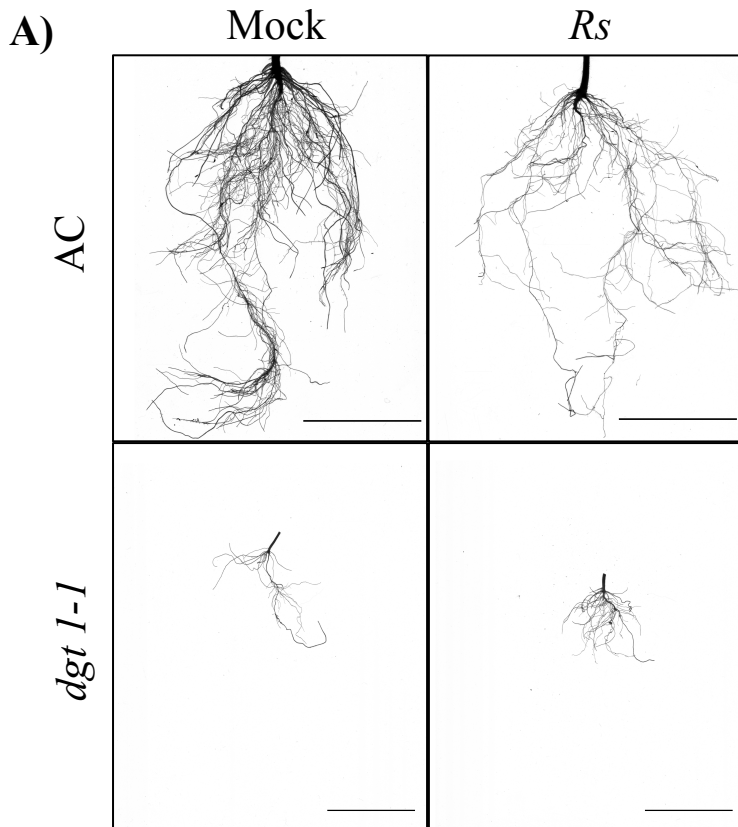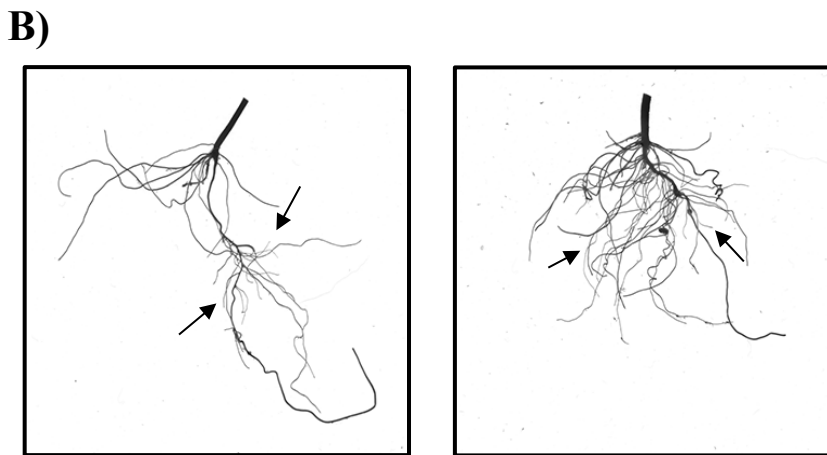

Fig. 10. Root architecture of susceptible AC and resistant *dgt1-1* plants at 6 dpi grown in potting mix and soil-soak inoculated with water (mock) or *R. solanacearum* strain K60 (*Rs*). A) Plants were grown in potting mix and roots imaged with a flatbed scanner, B) Close-up images of *dgt1-1* in (A). Arrows point to examples of lateral roots. Images are representative of those from two independent biological replicates with six plants per replicate per treatment and genotype. Scale bars = 5 cm.

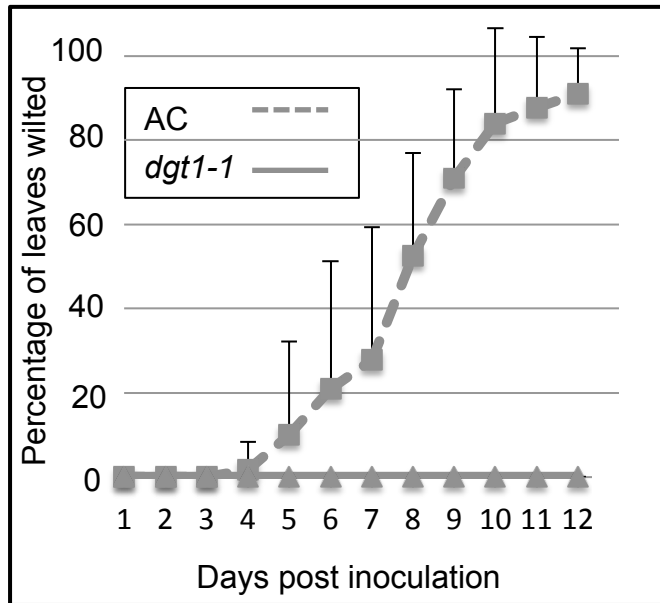

Fig. 11: The *dgt1-1* mutant shows enhanced resistance to *R. solanacearum* compared to its wild type susceptible parent AC with petiole inoculation. Wilting was scored daily based on the percentage of leaves wilted per plant. The experiment was repeated three times with 3 – 9 plants of each genotype per experiment. The average of three experiments is shown. The average Area Under the Disease Progress Curve (AUDPC) for AC =  $401.6 \pm 154.8$ ; average AUDPC for *dgt1-1* =  $0 \pm 0$  ( $P < 0.01$ ; two-tailed t-test with unequal variance). Error bars represent standard deviation.
